# Supplementary material for: Polymer-supported PPh3 as a reusable organocatalyst for the Mukaiyama aldol and Mannich reaction
Source: Royal Society of Chemistry journal article supplement (doi:10.1039/c4ra03394a), 2014-01-01
Supplement: c4ra03394a1.pdf [file c4ra03394a1.pdf]

Supporting Information

**Polymer-supported PPh<sub>3</sub> as a reusable organocatalyst for the Mukaiyama  
aldol reaction of aldehydes and imines**

**Satoru Matsukawa,\* Kazuki Fukazawa, and Junya Kimura**

Department of Science Education, Faculty of Education, Ibaraki University

Mito, Ibaraki 310-8512, Japan

|                                                                           |            |
|---------------------------------------------------------------------------|------------|
| <b>Instrumentation and Chemicals</b>                                      | <b>S2</b>  |
| <b>Experimental procedure</b>                                             | <b>S2</b>  |
| <b>Copies of <sup>1</sup>H and <sup>13</sup>C NMR Spectra of products</b> | <b>S7</b>  |
| <b>References</b>                                                         | <b>S27</b> |

## General

All reactions were performed under an argon atmosphere using oven-dried glassware. Flash column chromatography was performed using silica gel Wakogel C-200. Preparative thin-layer chromatography was carried out on silica gel Wakogel B-5F. Dehydrate DMF, THF, toluene and CH<sub>3</sub>CN were purchased from Wako Chemical. Other commercially available reagents was used as received without further purification. Yields refer to isolated compounds estimated to be >95% pure, as determined by <sup>1</sup>H NMR spectroscopy. IR spectra were recorded on a JUSCO FT/IR-430 spectrometer. <sup>1</sup>H and <sup>13</sup>C NMR spectra were determined for solutions in CDCl<sub>3</sub> with Me<sub>4</sub>Si as internal standard on a Bruker Avance III instrument. HRMS data were measured on a JEOL JMS-700 mass spectrometer.

### General procedure for PS-PPh<sub>3</sub> catalyzed Mukaiyama aldol reaction of aldehyde with silyl ketene acetals

To a solution of PS-PPh<sub>3</sub> (0.05mmol) in DMF (1 mL) was added aldehyde 1 (1.0 mmol) and silyl ketene acetal (1.25 mmol) at room temperature. After the reaction was complete (as determined by TLC), EtOAc (5 ml) was added to the mixture and PS-PPh<sub>3</sub> was separated by filtration. The filtrate was concentrated under vacuum and purified by column chromatography on silica gel (EtOAc:hexane = 1:3) to give the corresponding product. The recovered catalyst is reusable after washing (acetone, NH<sub>4</sub>OH and water) and drying in vacuo.

### General procedure for PS-PPh<sub>3</sub> catalyzed Mukaiyama aldol reaction of imine with silyl ketene acetals

To a solution of PS-PPh<sub>3</sub> (0.10 mmol) in DMF (1 mL) was added aldehyde 1 (1.0 mmol) and silyl ketene acetal (1.25 mmol) at room temperature or 30 °C. After the reaction was complete (as determined by TLC), EtOAc (15 ml) was added to the mixture and PS-PPh<sub>3</sub> was separated by filtration. The filtrate was washed with brine and water and dried over anhydrous Na<sub>2</sub>SO<sub>4</sub>, then evaporated. The crude mixture was purified by preparative TLC (EtOAc:hexane = 1:3) to afford the corresponding product.

**Methyl 3-(4-methoxyphenyl)-2,2-dimethyl-3-trimethyl-silyloxypropionate (3a)<sup>1</sup>:** Colorless oil; yield: 303 mg (94 %); <sup>1</sup>H NMR (500 MHz, CDCl<sub>3</sub>): δ 0.09 (s, 9H), 0.93 (s, 3H), 1.06 (s, 3H), 3.63 (s, 3H), 3.75 (s, 3H), 4.88 (s, 1H), 6.77 (d, *J* = 8.6 Hz, 5H), 7.13 (d, *J* = 8.6 Hz, 5H); <sup>13</sup>C NMR (125 MHz, CDCl<sub>3</sub>) δ =0.0, 19.1, 21.7, 49.1, 51.6, 55.2, 78.8, 112.8, 128.8, 133.0, 158.9, 177.4; HRMS (FAB): *m/z*: calcd for C<sub>16</sub>H<sub>27</sub>O<sub>4</sub>Si: 323.1679; found: 323.1961 [M + H]<sup>+</sup>.

**Methyl 2,2-dimethyl-3-phenyl-3-trimethylsilyloxypropionate (3b)<sup>2</sup>:** Colorless oil; yield: 255 mg (91 %); <sup>1</sup>H NMR (500 MHz, CDCl<sub>3</sub>): δ 0.04 (s, 9H), 0.97 (s, 3H), 1.11 (s, 3H), 3.66 (s, 3H), 4.96 (s, 1H), 4.92 (s, 1H), 7.22-7.32 (m, 5H); <sup>13</sup>C NMR (125 MHz, CDCl<sub>3</sub>) δ = 0.0, 19.0, 22.0, 49.1, 51.7, 79.2, 127.4, 127.8, 140.7, 177.3; HRMS (FAB): *m/z*: calcd for C<sub>15</sub>H<sub>25</sub>O<sub>3</sub>Si: 281.1573; found: 281.1568 [M + H]<sup>+</sup>.

**Methyl 3-(4-chlorophenyl)-2,2-dimethyl-3-trimethylsilyloxy-propionate (3c)<sup>2</sup>:** White solid; m.p. 53 °C; yield: 299 mg (95 %); <sup>1</sup>H NMR (500 MHz, CDCl<sub>3</sub>): δ 0.06 (s, 9H), 0.94 (s, 3H), 1.08 (s, 3H), 3.64 (s, 3H), 7.18 (d, *J* = 8.4 Hz, 5H), 7.23 (d, *J* = 8.6 Hz, 5H); <sup>13</sup>C NMR (125 MHz, CDCl<sub>3</sub>) δ = 0.0, 19.2, 21.4, 48.9, 51.7, 78.5, 127.6, 129.2, 133.1, 139.5, 177.0; HRMS (FAB): *m/z*: calcd for C<sub>15</sub>H<sub>24</sub>ClO<sub>3</sub>Si: 315.1183; found: 315.1175 [M + H]<sup>+</sup>.

**Methyl 3-(4-methylphenyl)-2,2-dimethyl-3-trimethylsilyloxy-propionate (3d)<sup>3</sup>:** Colorless oil; yield: 259 mg (88 %); <sup>1</sup>H NMR (500 MHz, CDCl<sub>3</sub>): δ 0.07 (s, 9H), 0.96 (s, 3H), 1.09 (s, 3H), 2.30 (s, 3H), 3.65 (s, 3H), 4.91 (s, 1H), 7.05 (d, *J* = 8.0 Hz, 5H), 7.13 (d, *J* = 8.0 Hz, 5H); <sup>13</sup>C NMR (125 MHz, CDCl<sub>3</sub>) δ = 0.0, 19.1, 21.1, 21.7, 49.0, 51.6, 79.0, 127.7, 128.1, 136.9, 137.8, 177.5; HRMS (FAB): *m/z*: calcd for C<sub>16</sub>H<sub>27</sub>O<sub>3</sub>Si: 295.1729; found: 295.1727[M + H]<sup>+</sup>.

**Methyl 2,2-dimethyl-3-(4-Nitromethoxyphenyl)-3-trimethyl-silyloxypropionate (3e)<sup>3</sup>:** White solid; m.p. 116 °C; yield: 275 mg (85 %); <sup>1</sup>H NMR (500 MHz, CDCl<sub>3</sub>): δ 0.04 (s, 9H), 0.97 (s, 3H), 1.11 (s, 3H), 3.65 (s, 3H), 5.03 (s, 1H), 7.43 (d, *J* = 8.5 Hz, 5H), 8.13 (d, *J* = 8.5 Hz, 5H); <sup>13</sup>C NMR (125 MHz, CDCl<sub>3</sub>) δ = 0.0, 19.7, 21.3, 49.1, 52.0, 78.3, 122.8, 128.5, 147.4, 148.7, 176.5.; HRMS (FAB): *m/z*: calcd for C<sub>15</sub>H<sub>24</sub>NO<sub>5</sub>Si: 326.1424; found: 326.1417 [M + H]<sup>+</sup>.

**Methyl 3-[4-(dimethylamino)phenyl]-2,2-dimethyl-3-trimethylsilyloxypropionate (3f)<sup>2</sup>:** White solid; m.p. 76 °C; yield: 291 mg (90 %); <sup>1</sup>H NMR (500 MHz, CDCl<sub>3</sub>): δ 0.08 (s, 9H), 0.94 (s, 3H), 1.07 (s, 3H), 2.92 (s, 6H), 3.64 (s, 3H), 4.86 (s, 1H), 6.55-6.70 (m, 2H), 7.05-7.15 (m, 2H); <sup>13</sup>C NMR (125 MHz, CDCl<sub>3</sub>) δ = 0.0, 18.9, 21.9, 40.7, 49.2, 51.7, 79.1, 111.4, 128.7, 149.8, 177.6; HRMS (FAB): *m/z*: calcd for C<sub>17</sub>H<sub>30</sub>NO<sub>3</sub>Si: 324.1995; found: 324.2007 [M + H]<sup>+</sup>.

**Methyl 2,2-dimethyl-3-(naphthalene-1-yl)-3-trimethylsilyloxy-propionate (3g)<sup>4</sup>:** Colorless oil; yield: 285 mg (86 %); <sup>1</sup>H NMR (500 MHz, CDCl<sub>3</sub>): δ -0.11 (s, 9H), 0.93 (s, 3H), 1.21 (s, 3H), 3.64 (s, 3H), 6.00 (s, 1H), 7.40-7.51 (m, 3H), 7.69 (d, *J* = 7.4 Hz, 1H), 7.76 (d, *J* = 8.2 Hz, 1H), 7.82 (d, *J* = 7.4 Hz, 1H), 8.15 (d, *J* = 8.2 Hz, 1H); <sup>13</sup>C NMR (125 MHz, CDCl<sub>3</sub>) δ = -0.1, 18.5, 23.0, 50.0, 51.8, 72.9, 123.2, 124.8, 125.0,

125.7, 127.0, 127.9, 128.8, 131.6, 133.2, 136.8, 177.5; HRMS (FAB):  $m/z$ : calcd for  $C_{19}H_{27}O_3Si$ : 331.1729; found: 331.1736  $[M + H]^+$ .

**Methyl 2,2-dimethyl-3-(naphthalene-2-yl)-3-trimethylsilyloxy-propionate (3h)<sup>5</sup>:** White solid; m.p. 70 °C; yield: 315 mg (95 %);  $^1H$  NMR (500 MHz,  $CDCl_3$ ):  $\delta$  -0.05 (s, 9H), 1.02 (s, 3H), 1.15 (s, 3H), 3.67 (s, 3H), 5.13 (s, 1H), 7.40-7.47 (m, 3H), 7.67 (d,  $J$  = 4.4 Hz, 1H), 7.74 (d,  $J$  = 8.5 Hz, 1H), 7.81 (d,  $J$  = 7.4 Hz, 2H);  $^{13}C$  NMR (125 MHz,  $CDCl_3$ )  $\delta$  = 0.0, 19.2, 21.8, 49.3, 51.7, 79.3, 125.7, 125.9, 126.1, 126.6, 127.0, 127.6, 128.0, 132.8, 133.0, 138.5, 177.3; HRMS (FAB):  $m/z$ : calcd for  $C_{19}H_{27}O_3Si$ : 331.1729; found: 331.1715  $[M + H]^+$ .

**Methyl (4E)-2,2-dimethyl-5-phenyl-3-trimethylsilyloxypent-4-enoate (3i)<sup>3</sup>:** Colorless oil; yield: 285 mg (93 %);  $^1H$  NMR (500 MHz,  $CDCl_3$ ):  $\delta$  0.00 (s, 9H), 1.02 (s, 3H), 1.11 (s, 3H), 3.59 (s, 3H), 4.40 (d,  $J$  = 7.0 Hz, 1H), 6.03 (dd,  $J$  = 7.0, 16.0 Hz, 1H), 6.41 (d,  $J$  = 16.0 Hz, 1H), 7.16 (d,  $J$  = 7.4 Hz, 1H), 7.24 (dd,  $J$  = 7.2, 7.5 Hz, 2H), 7.28 (d,  $J$  = 7.2 Hz, 2H);  $^{13}C$  NMR (125 MHz,  $CDCl_3$ )  $\delta$  = 0.3, 19.8, 21.2, 48.5, 51.8, 78.5, 126.4, 127.6, 128.6, 128.8, 132.0, 136.8, 177.1; HRMS (FAB):  $m/z$ : calcd for  $C_{17}H_{27}O_3Si$ : 307.1729; found: 307.1740  $[M + H]^+$ .

**Methyl 2,2-dimethyl-5-phenyl-3-trimethylsilyloxypentanoate (3j)<sup>3</sup>:** Colorless oil; yield: 268 mg (87 %);  $^1H$  NMR (500 MHz,  $CDCl_3$ ):  $\delta$  0.14 (s, 9H), 1.08 (s, 3H), 1.16 (s, 3H), 1.61-1.66 (m, 2H), 2.40-2.55 (m, 2H), 3.64 (s, 3H), 3.97 (d,  $J$  = 12.0 Hz, 1H), 7.16-7.22 (m, 2H), 7.24-7.29 (m, 2H);  $^{13}C$  NMR (125 MHz,  $CDCl_3$ )  $\delta$  = 0.9, 20.3, 21.6, 33.5, 35.2, 48.4, 51.8, 77.5, 125.8, 128.3, 128.4, 142.2, 177.6; HRMS (FAB):  $m/z$ : calcd for  $C_{17}H_{29}O_3Si$ : 309.1886; found: 309.1876  $[M]^+$ .

**Methyl 2,2-dimethyl-3-trimethylsilyloxy-dodecanoate (3k)<sup>2</sup>:** Colorless oil; yield: 288 mg (91 %);  $^1H$  NMR (500 MHz,  $CDCl_3$ ):  $\delta$  0.09 (s, 9H), 0.85 (t,  $J$  = 8.1 Hz, 3H), 1.04 (s, 3H), 1.11 (s, 3H), 1.11-1.45 (m, 12H), 1.53-1.64 (m, 2H), 3.64 (s, 3H), 3.83 (d,  $J$  = 9.1 Hz, 1H);  $^{13}C$  NMR (125 MHz,  $CDCl_3$ )  $\delta$  = 0.7, 14.1, 20.1, 21.6, 22.6, 27.0, 29.2, 29.5, 29.7, 31.8, 32.8, 48.2, 51.5, 77.7, 177.8; HRMS (FAB):  $m/z$ : calcd for  $C_{17}H_{37}O_3Si$ : 317.2512; found: 317.2523  $[M + H]^+$ .

**Methyl 3-(2-furyl)-2,2-dimethyl-3-trimethylsilyloxy-propionate (3l)<sup>2</sup>:** Colorless oil; yield: 242 mg (84 %);  $^1H$  NMR (500 MHz,  $CDCl_3$ ):  $\delta$  0.00 (s, 9H), 1.04 (s, 3H), 1.23 (s, 3H), 3.68 (s, 3H), 5.00 (s, 1H), 6.20 (d,  $J$  = 3.2 Hz, 1H), 6.31 (d,  $J$  = 3.2 Hz, 1H), 7.32-7.34 (m, 1H);  $^{13}C$  NMR (125 MHz,  $CDCl_3$ )  $\delta$  = -0.3, 19.6,

21.2, 48.6, 51.8, 73.5, 107.9, 109.9, 141.5, 154.4, 176.8; HRMS (FAB):  $m/z$ : calcd for  $C_{13}H_{23}O_4Si$ : 271.1366; found: 271.1363  $[M + H]^+$ .

**Ethyl 3-3-hydroxy-3-phenylpropionate (5a)<sup>3</sup>**: Colorless oil; yield: 165 mg (85 %);  $^1H$  NMR (500 MHz,  $CDCl_3$ ):  $\delta$  1.26 (t,  $J = 7.2$  Hz, 3H), 2.70 (dd,  $J = 3.9, 16.4$  Hz, 1H), 2.76 (dd,  $J = 9.0, 16.4$  Hz, 1H), 3.30-3.34 (brs, 3H), 4.18 (q,  $J = 7.2$  Hz, 2H), 5.13 (dd,  $J = 2.8, 8.8$  Hz, 1H), 7.28-7.31 (m, 1H), 7.35-7.39 (m, 4H);  $^{13}C$  NMR (125 MHz,  $CDCl_3$ )  $\delta = 14.1, 43.2, 60.9, 70.3, 125.6, 127.8, 128.5, 142.4, 172.4$ ; HRMS (FAB):  $m/z$ : calcd for  $C_{11}H_{15}O_3$ : 195.1021; found: 195.1010  $[M + H]^+$ .

**Methyl 3-3-hydroxy-2-methyl-3-phenylpropionate (5b)<sup>2</sup>**: *syn* / *anti* mixture: Colorless oil; yield: 175 mg (90 %); HRMS (FAB):  $m/z$ : calcd for  $C_{11}H_{15}O_3$ : 195.1021; found: 195.1033  $[M + H]^+$ . *syn* Isomer:  $^1H$  NMR (500 MHz,  $CDCl_3$ ):  $\delta$  1.12 (d,  $J = 7.2$  Hz, 3H), 2.78 (dq,  $J = 4.1, 7.2$  Hz, 1H), 2.93-2.98 (brs, 3H), 3.67 (s, 3H), 5.10 (d,  $J = 4.0$  Hz, 1H), 7.23-7.30 (m, 1H), 7.31-7.39 (m, 4H);  $^{13}C$  NMR (125 MHz,  $CDCl_3$ )  $\delta = 10.6, 46.3, 51.8, 73.5, 125.9, 127.5, 128.2, 141.3, 176.2$ .; *anti* Isomer:  $^1H$  NMR (500 MHz,  $CDCl_3$ ):  $\delta$  1.00 (d,  $J = 7.2$  Hz, 3H), 2.83 (dq,  $J = 7.2, 8.4$  Hz, 1H), 2.90-3.05 (brs, 3H), 3.72 (s, 3H), 4.74 (d,  $J = 8.4$  Hz, 1H), 7.25-7.30 (m, 1H), 7.31-7.42 (m, 4H);  $^{13}C$  NMR (125 MHz,  $CDCl_3$ )  $\delta = 14.4, 47.1, 51.8, 76.4, 126.6, 128.1, 128.5, 141.5, 176.3$ .

**Methyl 4-chlorophenyl-2,2-Dimethyl-3-(tosylamino)propionate (7a)<sup>6</sup>**: White solid; m.p. 145 °C; yield: 332 mg (84 %);  $^1H$  NMR (500 MHz,  $CDCl_3$ ):  $\delta$  1.03 (s, 3H), 1.31 (s, 3H), 2.30 (s, 3H), 3.58 (s, 3H), 4.27 (d,  $J = 9.5$  Hz, 1H), 6.13 (d,  $J = 9.5$  Hz, 1H), 6.82 (d,  $J = 8.5$  Hz, 2H), 6.94-7.00 (m, 4H), 7.35 (d,  $J = 8.5$  Hz, 2H);  $^{13}C$  NMR (125 MHz,  $CDCl_3$ )  $\delta = 21.3, 22.5, 24.9, 46.9, 52.2, 64.3, 126.8, 128.0, 129.1, 129.3, 135.7, 137.5, 143.0, 176.4$ ; HRMS (FAB):  $m/z$ : calcd for  $C_{19}H_{23}ClNO_4S$ : 396.1036; found: 396.1022  $[M + H]^+$ .

**Methyl 2,2-dimethyl-3-phenyl-3-(tosylamino)propionate (7b)<sup>6</sup>**: White solid; m.p. 130 °C; yield: 285 mg (82 %);  $^1H$  NMR (500 MHz,  $CDCl_3$ ):  $\delta$  1.08 (s, 3H), 1.26 (s, 3H), 2.24 (s, 3H), 3.60 (s, 3H), 4.38 (d,  $J = 9.9$  Hz, 1H), 6.30 (d,  $J = 9.9$  Hz, 1H), 6.88 (d,  $J = 7.0$  Hz, 2H), 6.93 (d,  $J = 8.0$  Hz, 2H), 9.68-7.10 (m, 5H), 7.39 (d,  $J = 8.0$  Hz, 2H);  $^{13}C$  NMR (125 MHz,  $CDCl_3$ )  $\delta = 21.2, 22.1, 24.2, 41.3, 52.0, 64.5, 126.7, 127.2, 127.7, 127.8, 128.9, 136.9, 137.4, 142.5, 176.4$ ; HRMS (FAB):  $m/z$ : calcd for  $C_{19}H_{24}NO_4S$ : 362.1426; found: 362.1429  $[M + H]^+$ .

**Methyl 2,2-dimethyl-3-(4-nitrophenyl)-3-(tosylamino)propionate (7c)<sup>6</sup>**: White solid; m.p. 180 °C; yield: 365 mg (90 %);  $^1H$  NMR (500 MHz,  $CDCl_3$ ):  $\delta$  1.05 (s, 3H), 1.33 (s, 3H), 2.26 (s, 3H), 3.59 (s, 3H), 4.39 (d,

$J = 9.3$  Hz, 1H), 6.30 (d,  $J = 9.3$  Hz, 1H), 6.98 (d,  $J = 8.0$  Hz, 2H), 7.12 (d,  $J = 8.5$  Hz, 2H), 7.39 (d,  $J = 8.0$  Hz, 2H), 7.88 (d,  $J = 8.5$  Hz, 2H);  $^{13}\text{C}$  NMR (125 MHz,  $\text{CDCl}_3$ )  $\delta = 21.4, 22.5, 24.9, 46.8, 52.4, 64.2, 123.0, 126.8, 129.0, 129.2, 137.3, 143.4, 144.7, 147.1, 176.1$ ; HRMS (FAB):  $m/z$ : calcd for  $\text{C}_{19}\text{H}_{23}\text{N}_2\text{O}_6\text{S}$ : 407.1277; found: 407.1273  $[\text{M} + \text{H}]^+$ .

**Methyl 3-(4-methoxyphenyl)-2,2-dimethyl-3-(tosylamino)propionate (7d)<sup>6</sup>:** White solid; m.p. 114 °C; yield: 250 mg (64 %);  $^1\text{H}$  NMR (500 MHz,  $\text{CDCl}_3$ ):  $\delta$  1.04 (s, 3H), 1.25 (s, 3H), 2.25 (s, 3H), 3.57 (s, 3H), 3.68 (s, 3H), 4.29 (d,  $J = 9.2$  Hz, 1H), 6.12 (d,  $J = 9.2$  Hz, 1H), 6.53 (d,  $J = 8.8$  Hz, 2H), 6.78 (d,  $J = 8.5$  Hz, 2H), 7.36 (d,  $J = 8.8$  Hz, 2H), 7.81 (dd,  $J = 8.5, 8.8$  Hz, 2H);  $^{13}\text{C}$  NMR (125 MHz,  $\text{CDCl}_3$ )  $\delta = 21.5, 22.5, 24.6, 47.6, 52.2, 55.4, 64.3, 113.1, 126.9, 129.0, 129.1, 129.4, 137.7, 142.4, 158.8, 176.4$ ; HRMS (FAB):  $m/z$ : calcd for  $\text{C}_{20}\text{H}_{26}\text{NO}_5\text{S}$ : 392.1532; found: 392.1540  $[\text{M} + \text{H}]^+$ .

**Methyl 3-[4-(dimethylamino)phenyl]-2,2-dimethyl-3-(tosylamino)propionate (7e)<sup>6</sup>:** White solid; m.p. 155 °C; yield: 226 mg (56 %);  $^1\text{H}$  NMR (500 MHz,  $\text{CDCl}_3$ ):  $\delta$  1.04 (s, 3H), 1.25 (s, 3H), 2.23 (s, 3H), 2.82 (s, 6H), 3.57 (s, 3H), 4.23 (d,  $J = 9.6$  Hz, 1H), 5.99 (d,  $J = 9.6$  Hz, 1H), 6.34 (d,  $J = 7.1$  Hz, 2H), 6.68 (d,  $J = 8.6$  Hz, 2H), 6.91 (d,  $J = 8.0$  Hz, 2H), 7.34 (d,  $J = 8.6$  Hz, 2H);  $^{13}\text{C}$  NMR (125 MHz,  $\text{CDCl}_3$ )  $\delta = 21.3, 22.2, 24.5, 40.4, 47.3, 51.9, 64.4, 111.9, 126.9, 128.6, 128.8, 142.0, 149.7, 162.5, 176.8$ ; HRMS (FAB):  $m/z$ : calcd for  $\text{C}_{20}\text{H}_{26}\text{NO}_5\text{S}$ : 392.1532; found: 392.1540  $[\text{M} + \text{H}]^+$ .

**Methyl 2,2-dimethyl-3-phenyl-3-(phenylamino)propionate (7f)<sup>6</sup>:** Colorless oil; yield: 234 mg (82 %);  $^1\text{H}$  NMR (500 MHz,  $\text{CDCl}_3$ ):  $\delta$  1.13 (s, 3H), 1.24 (s, 3H), 2.23 (s, 3H), 3.62 (s, 3H), 4.46 (s, 1H), 4.70 (br, 1H), 6.46 (d,  $J = 8.5$  Hz, 2H), 6.56 (dd,  $J = 8.5, 8.8$  Hz, 1H), 7.00 (d,  $J = 8.5, 8.8$  Hz, 2H), 7.20-7.28 (m, 5H).  $^{13}\text{C}$  NMR (125 MHz,  $\text{CDCl}_3$ )  $\delta = 20.7, 24.5, 47.0, 52.0, 64.3, 113.3, 117.2, 127.4, 128.0, 128.2, 129.0, 139.2, 146.9, 177.0$ ; HRMS (FAB):  $m/z$ : calcd for  $\text{C}_{18}\text{H}_{22}\text{NO}_2$ : 284.1651; found: 286.1648  $[\text{M} + \text{H}]^+$

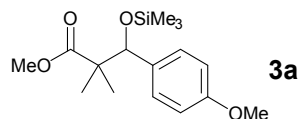

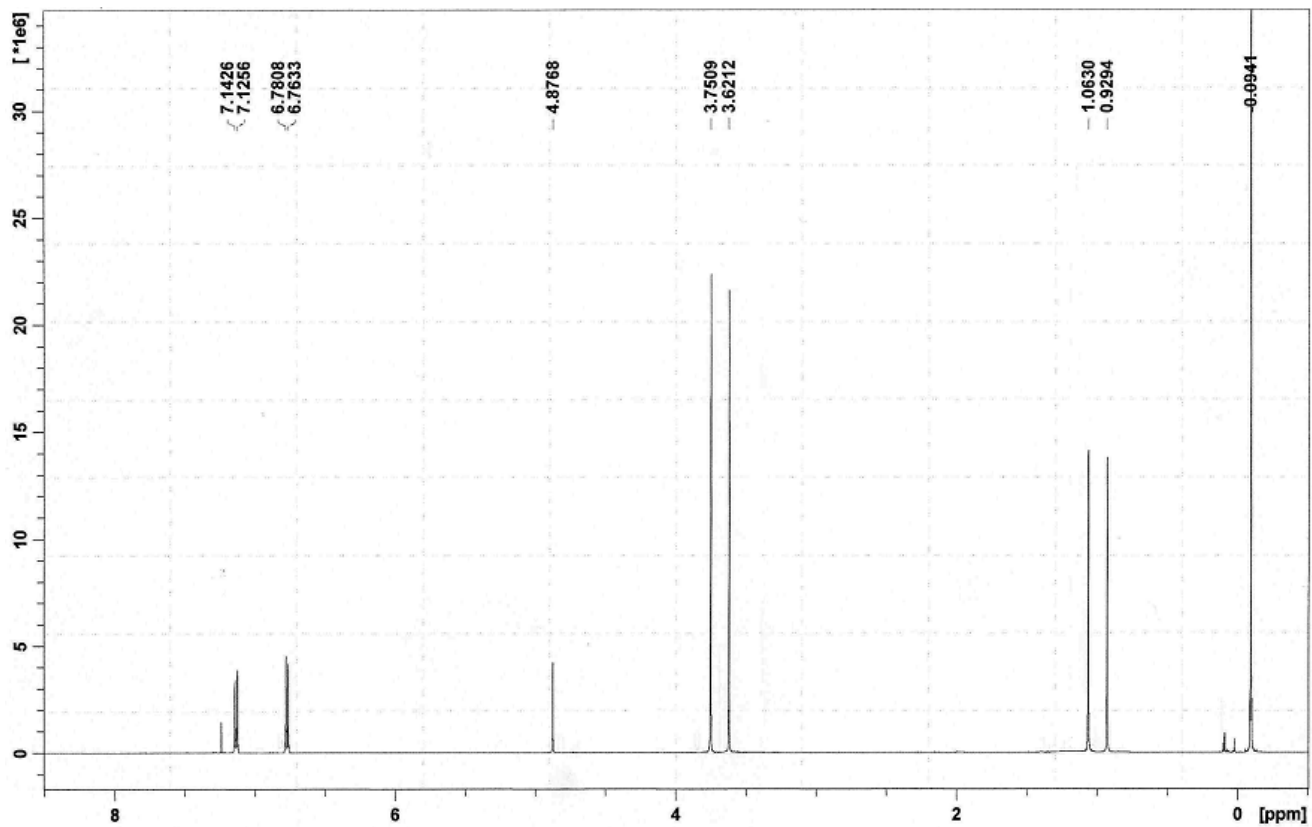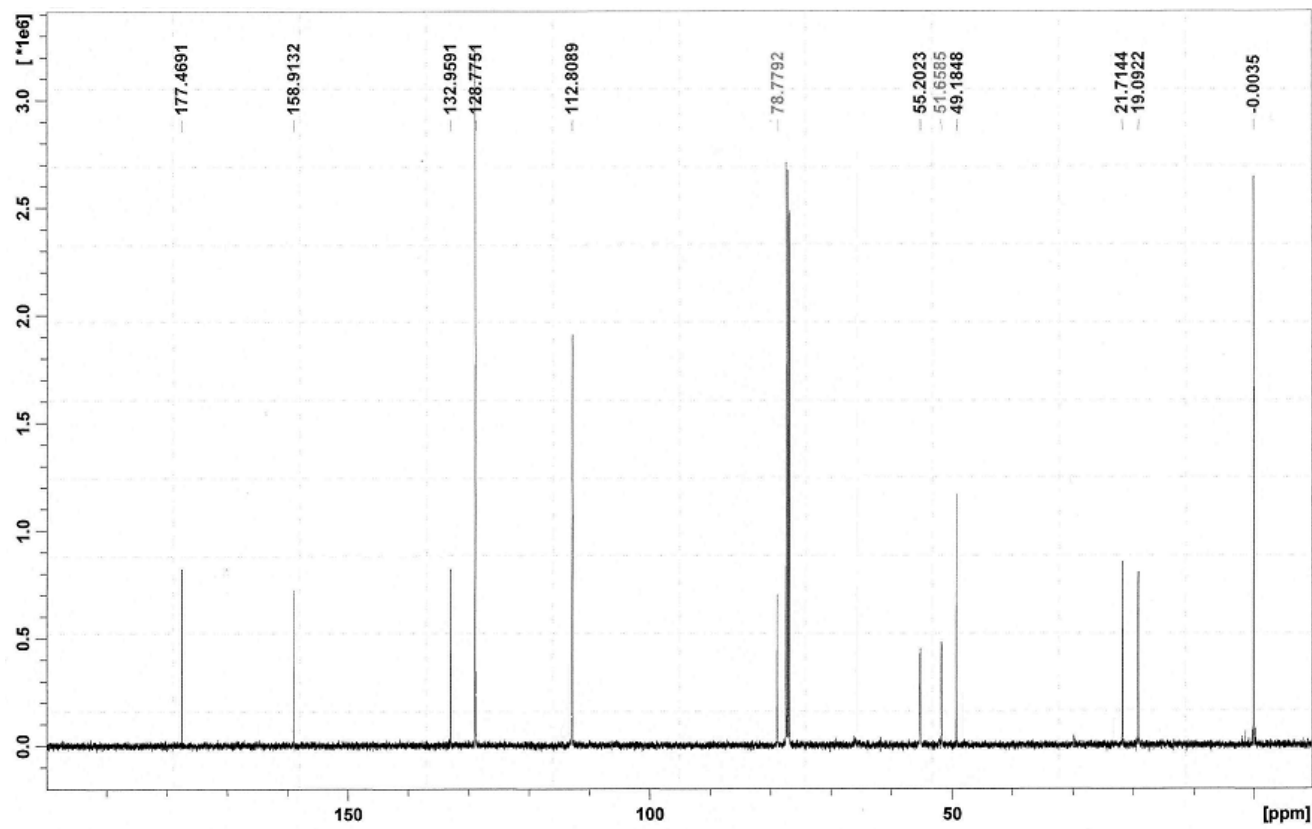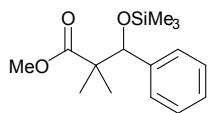

**3b**

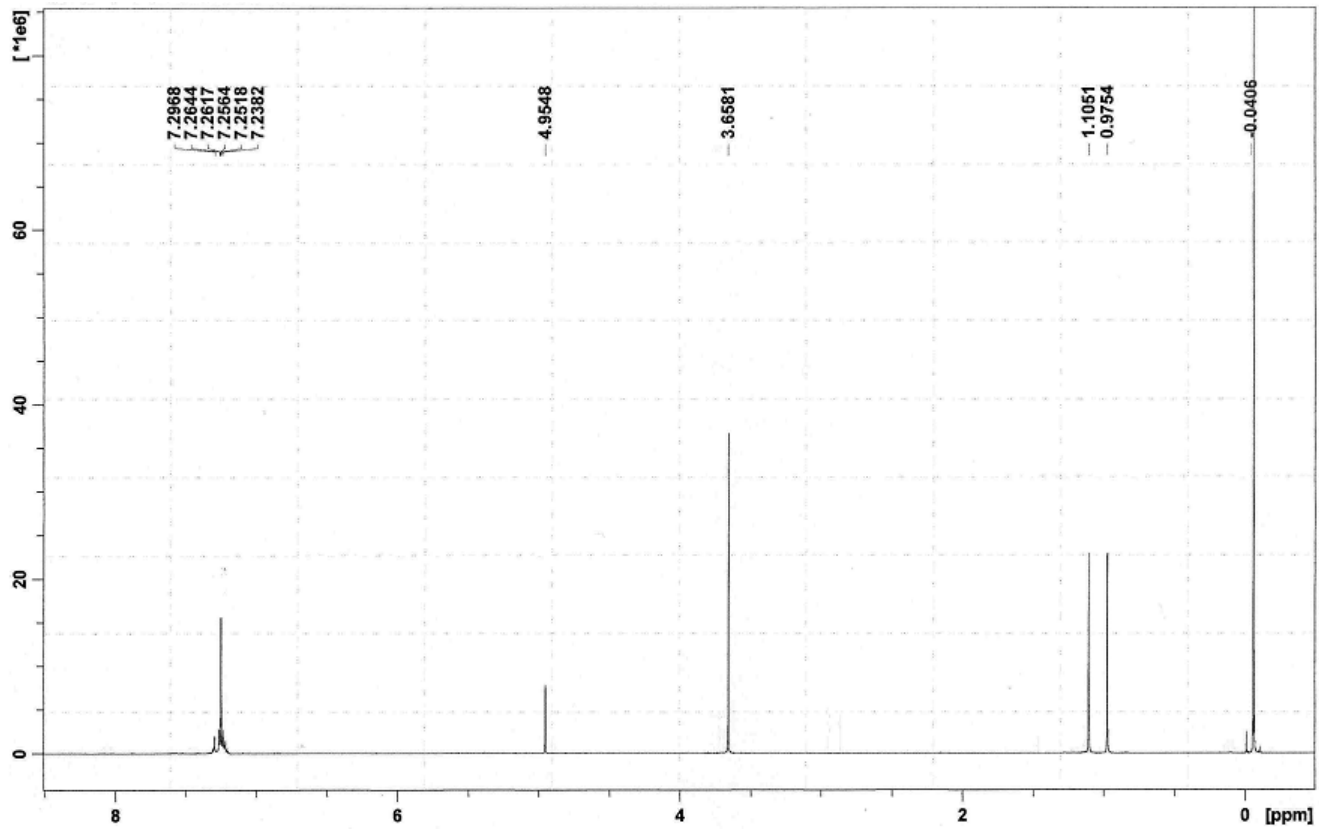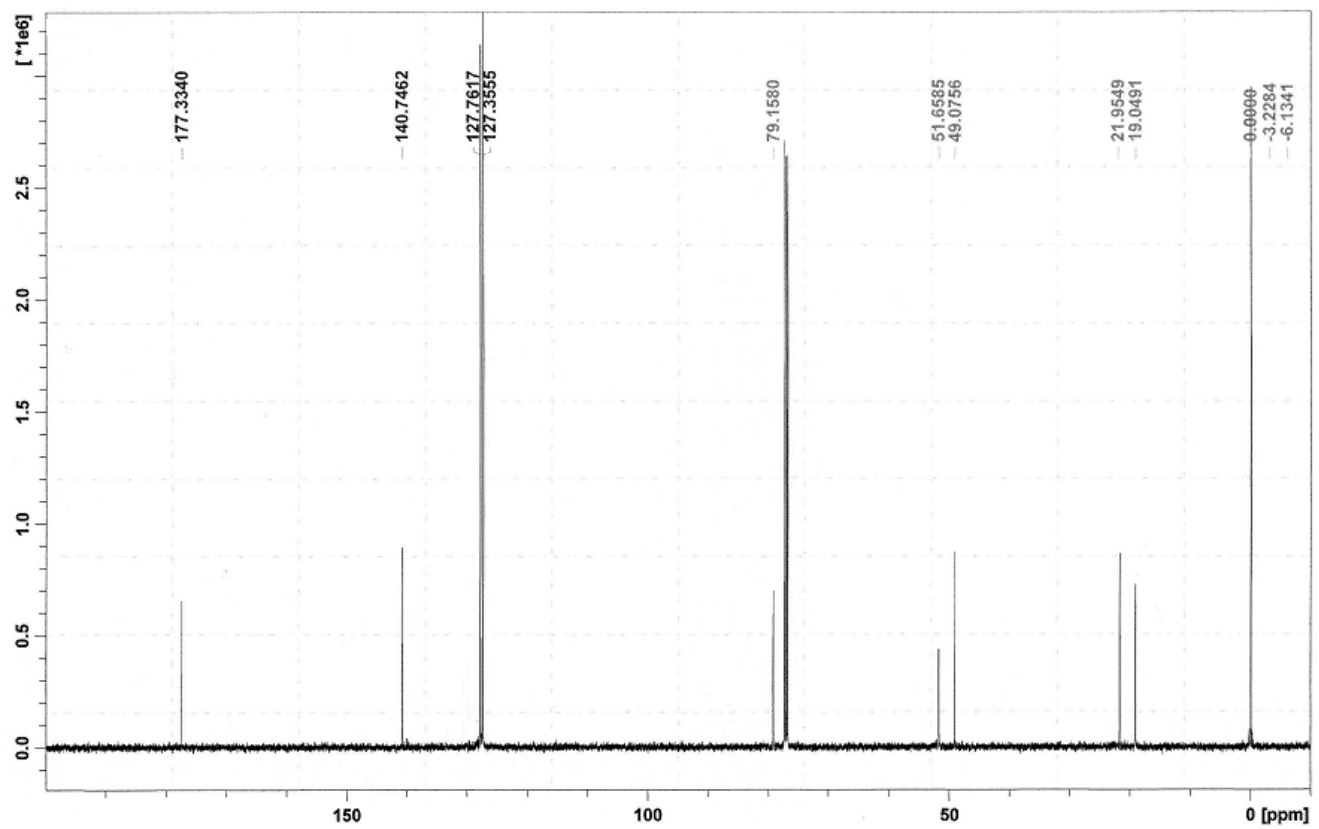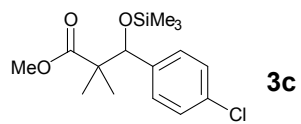



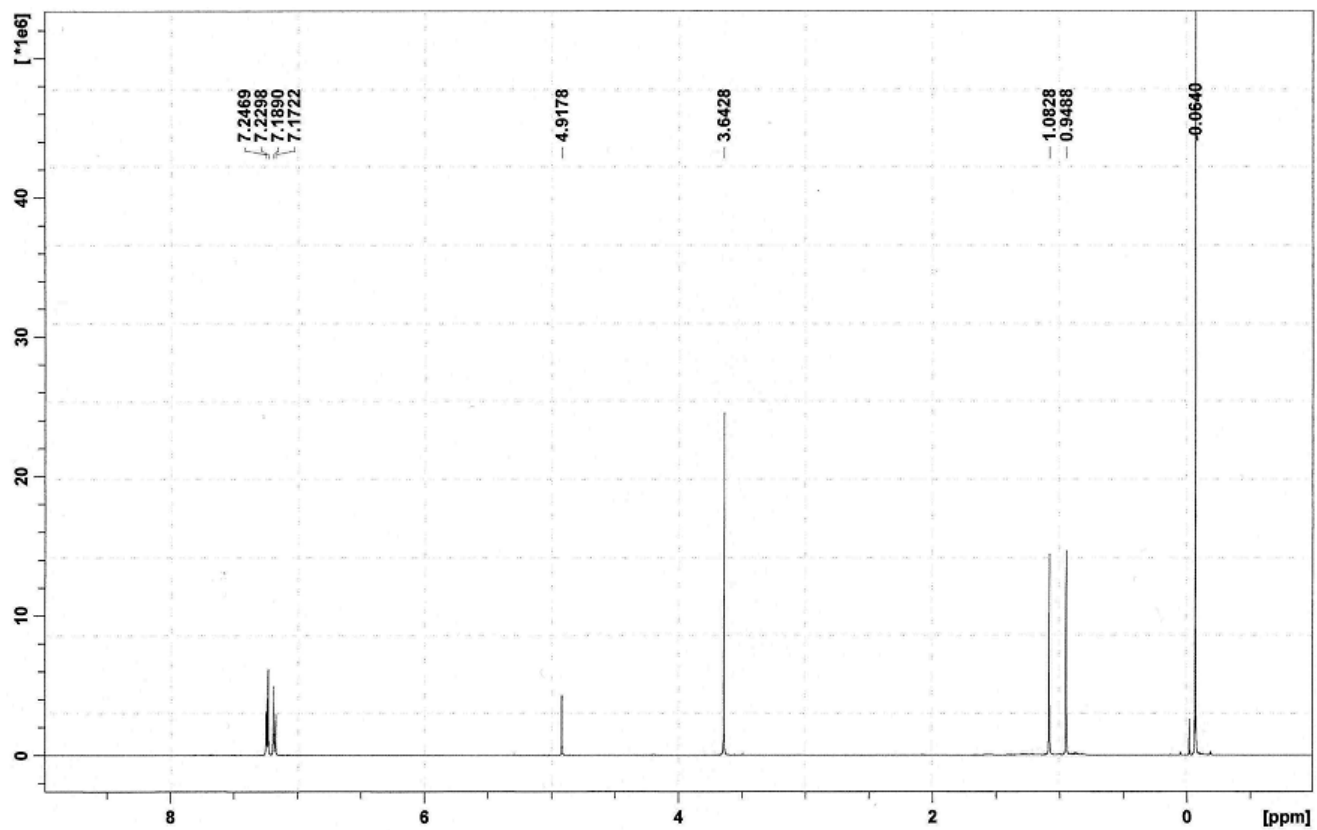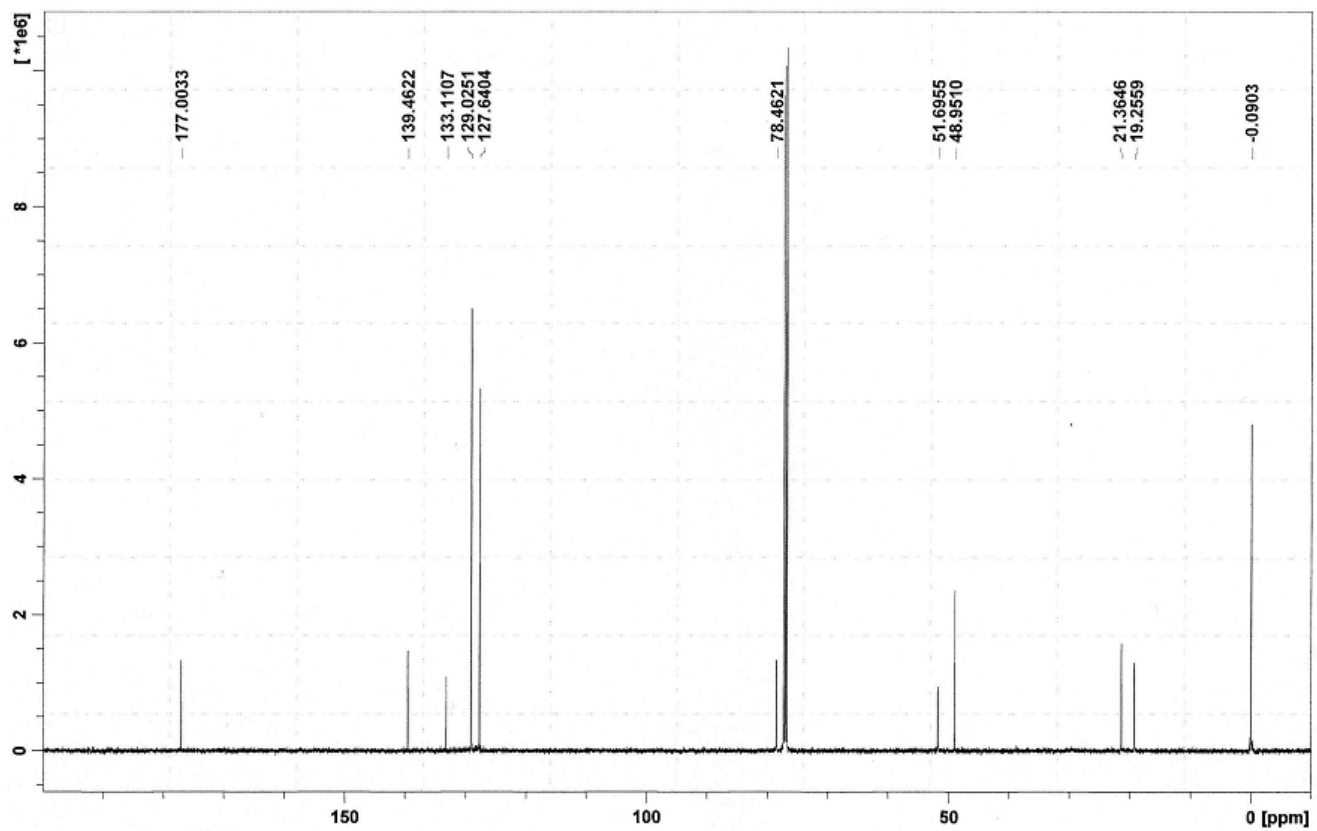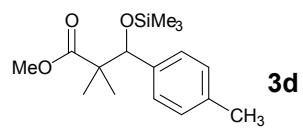

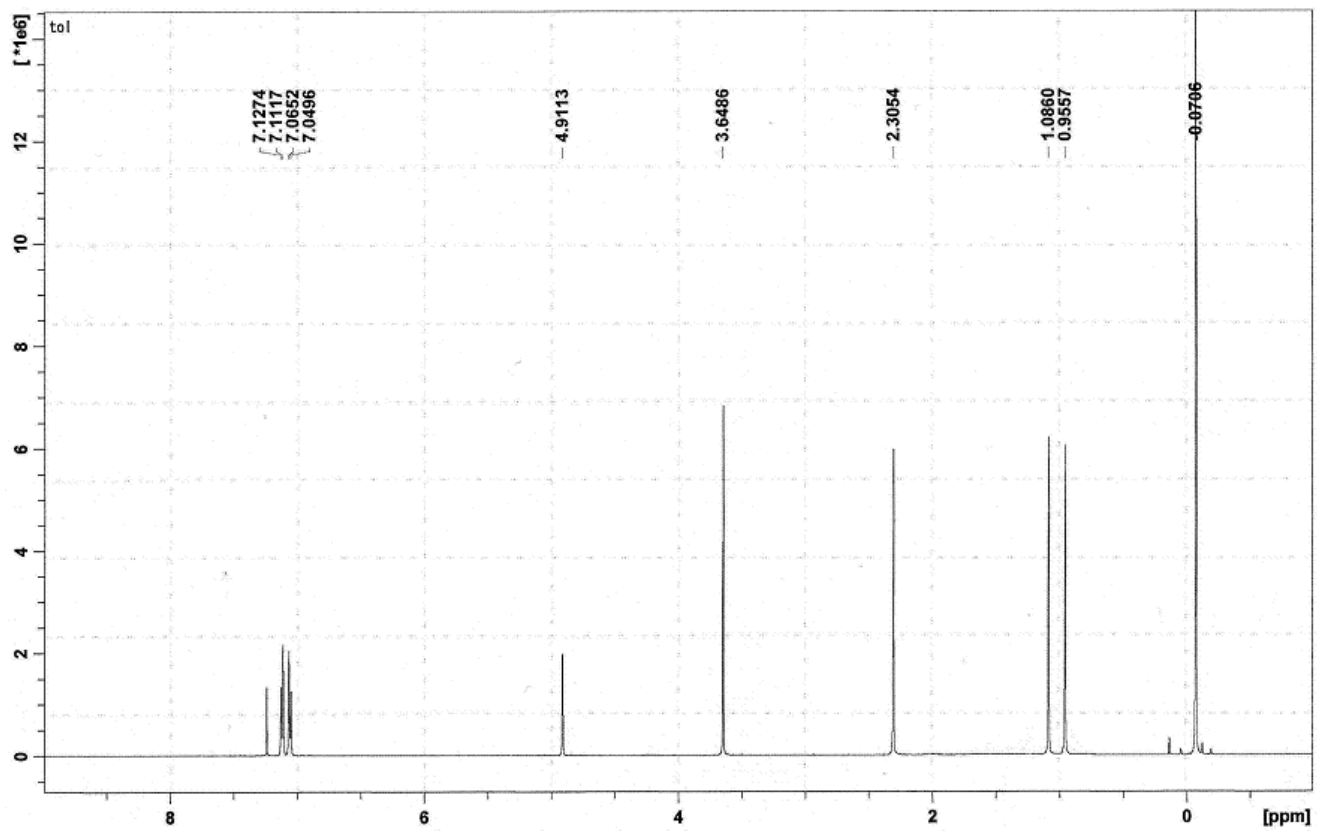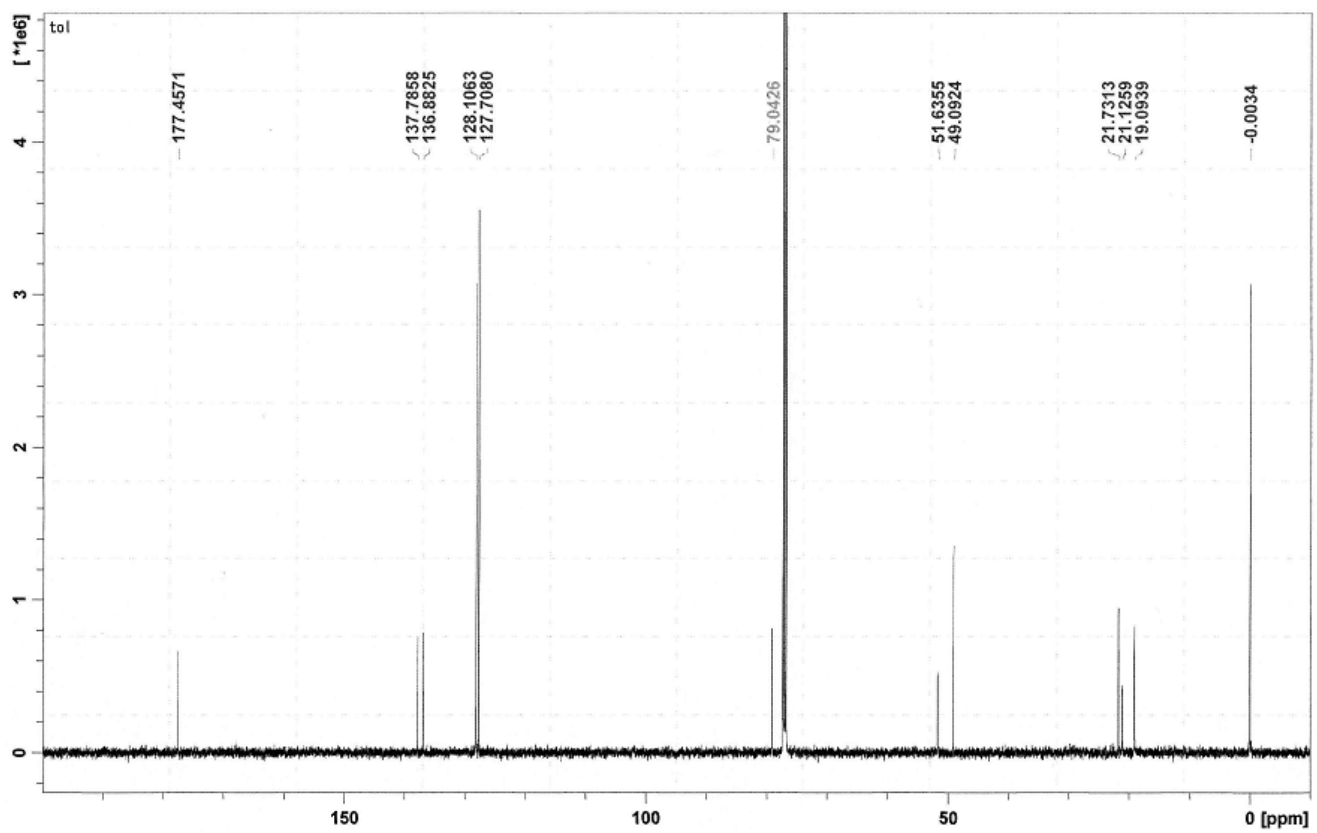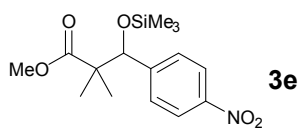

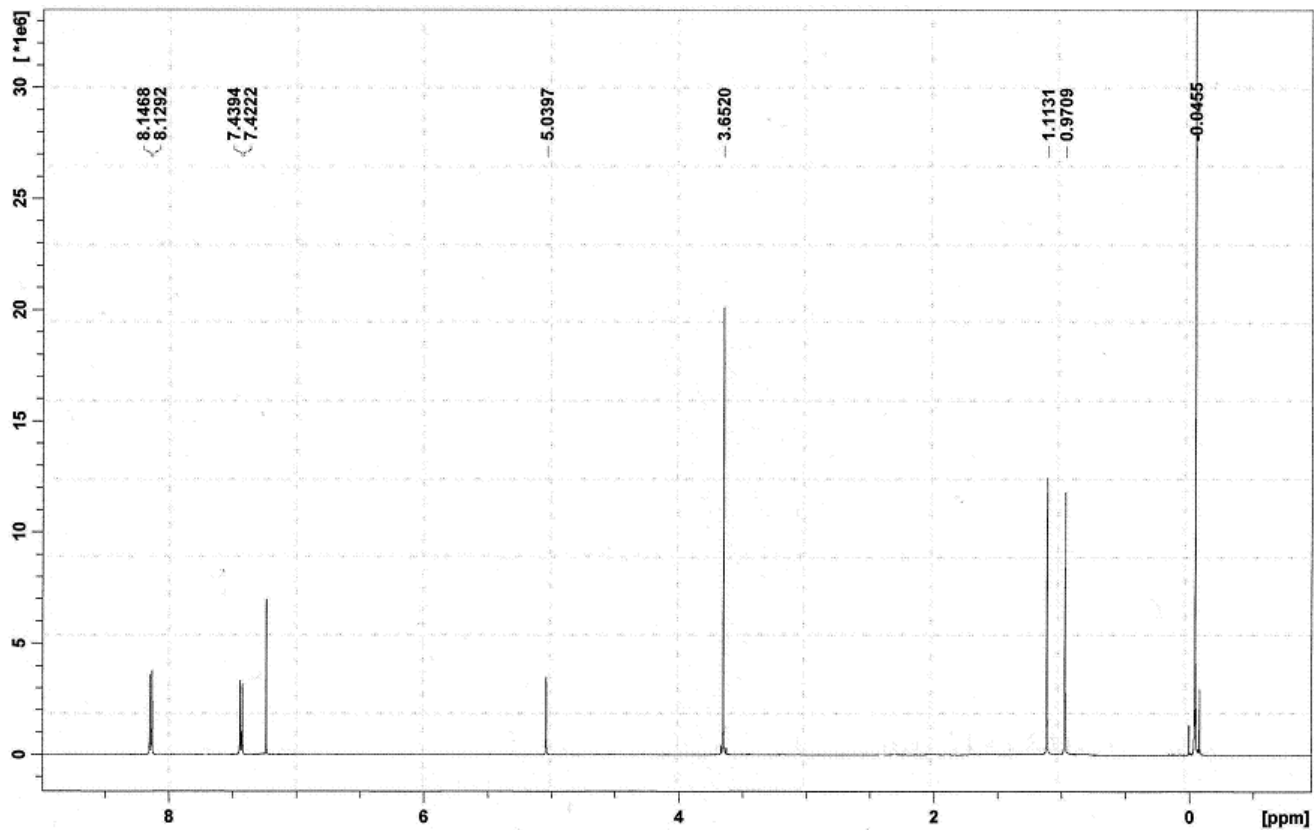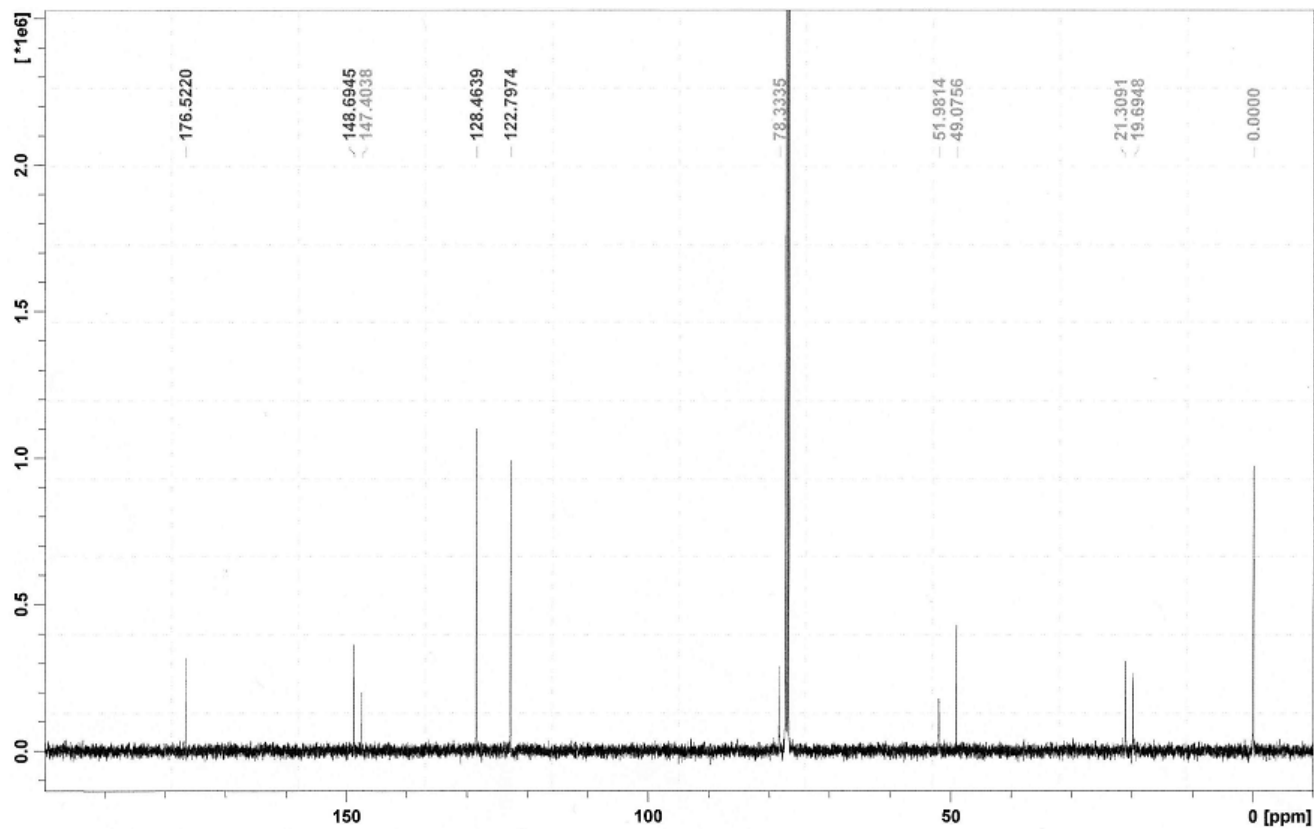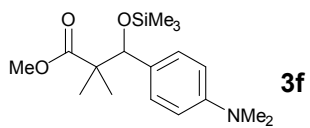

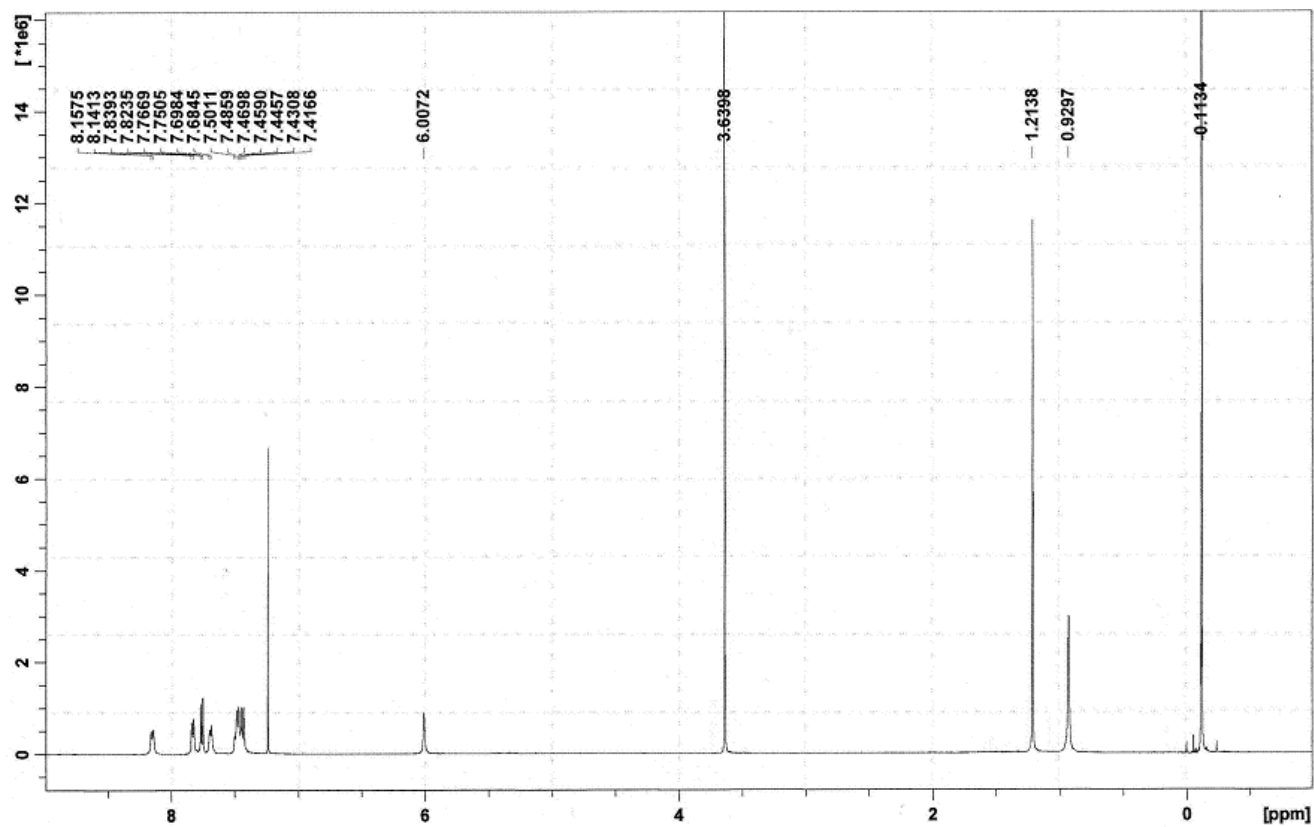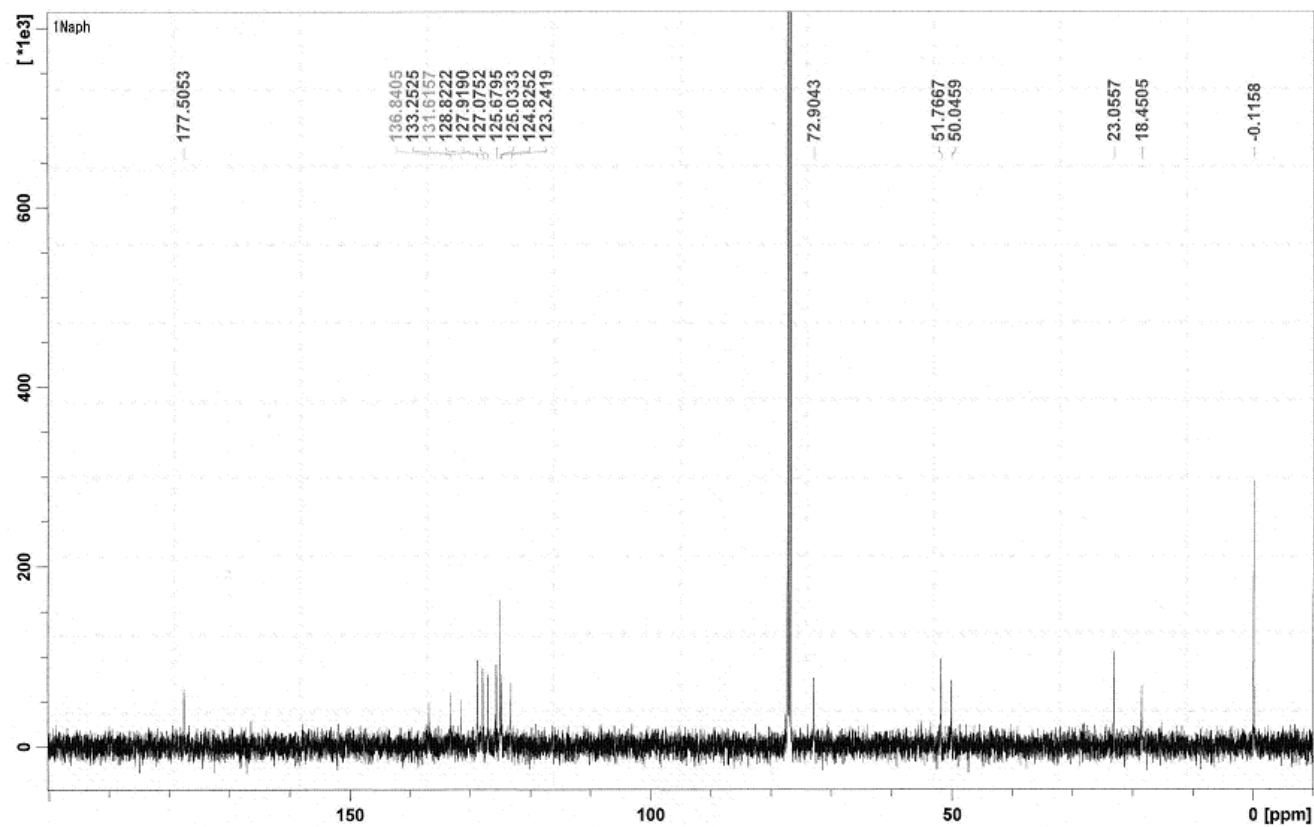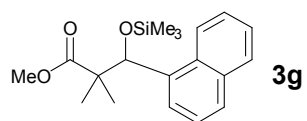

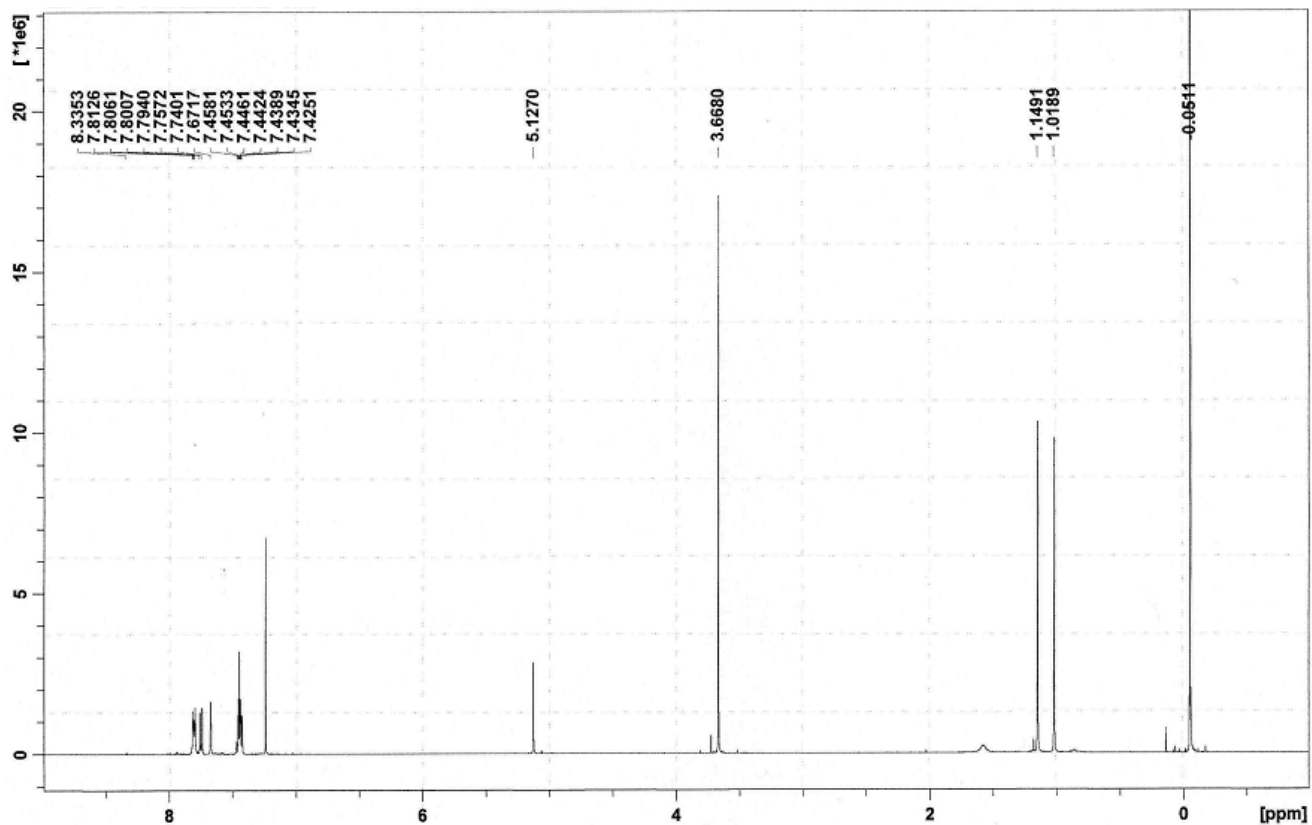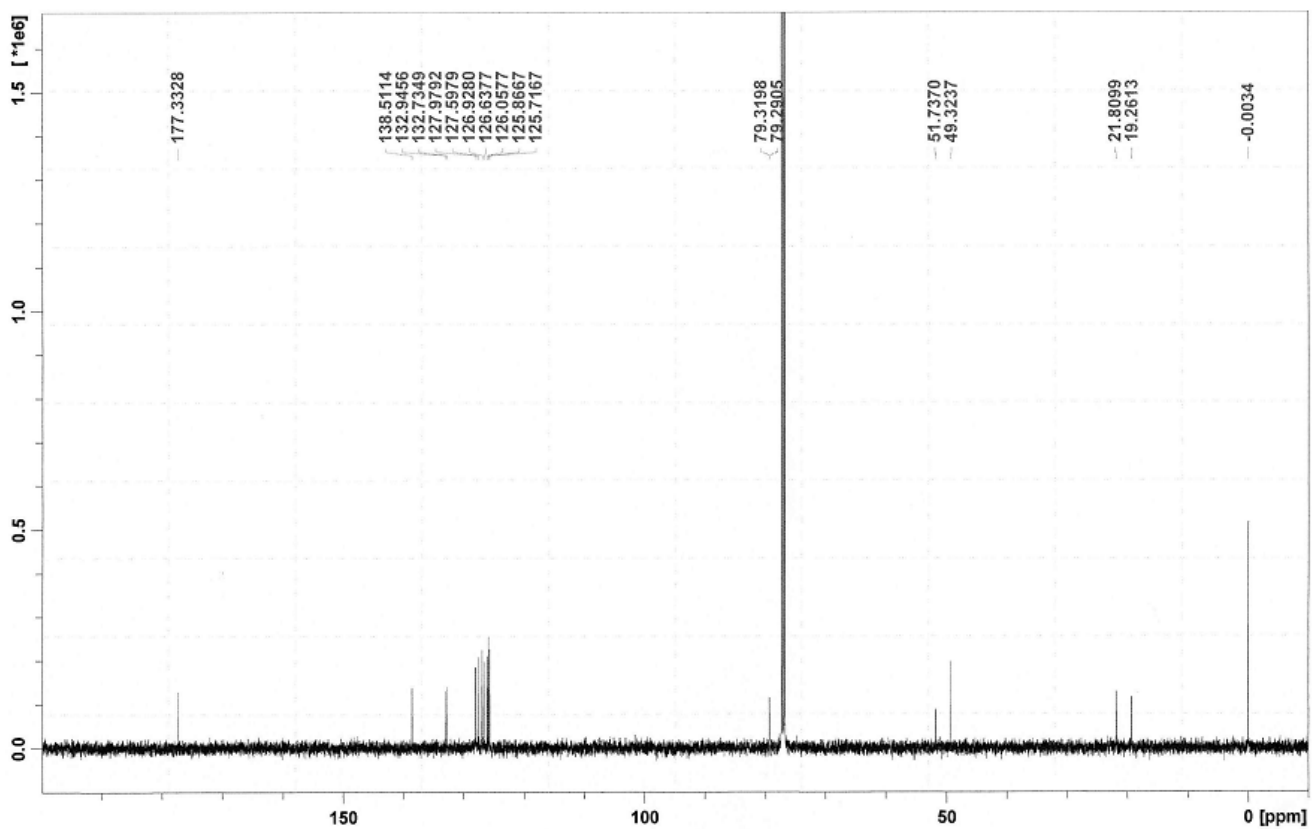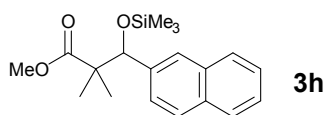

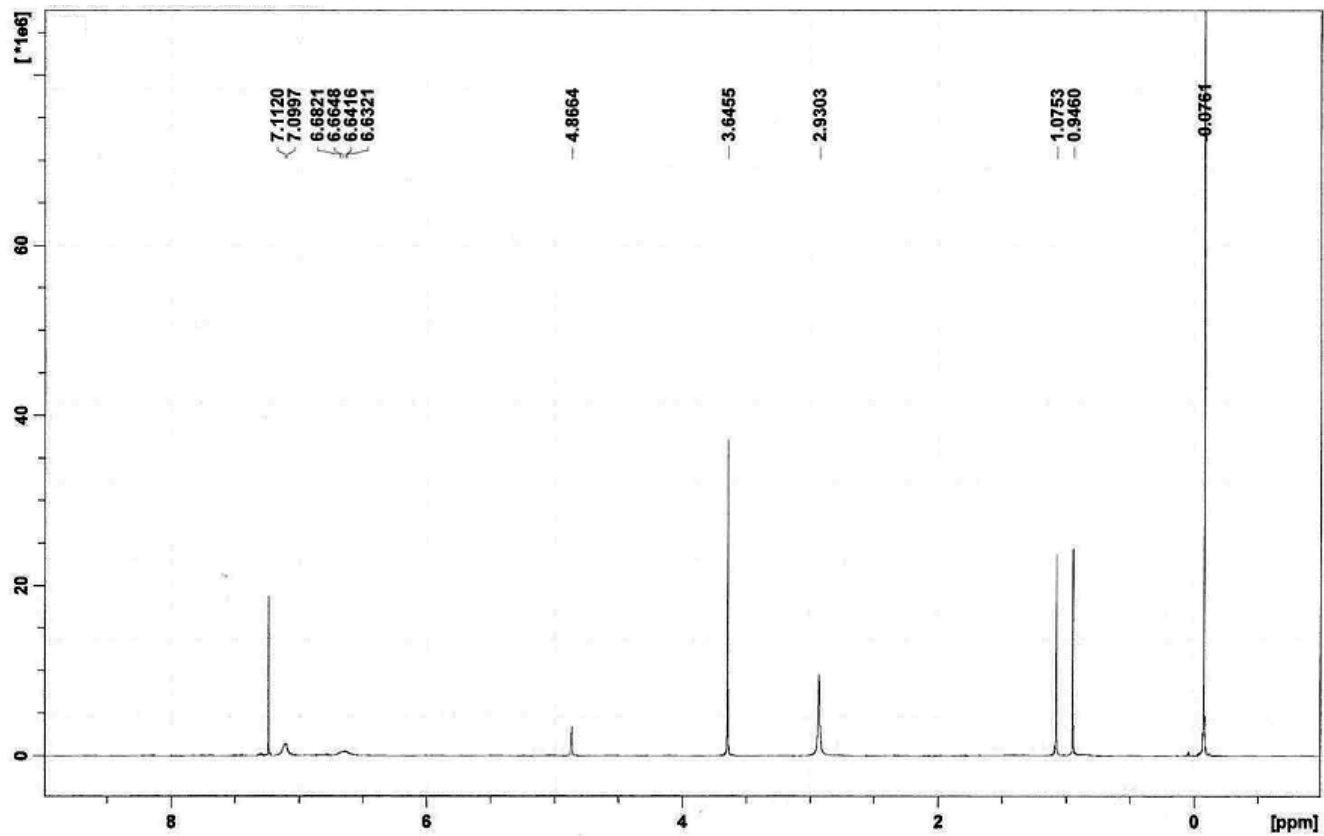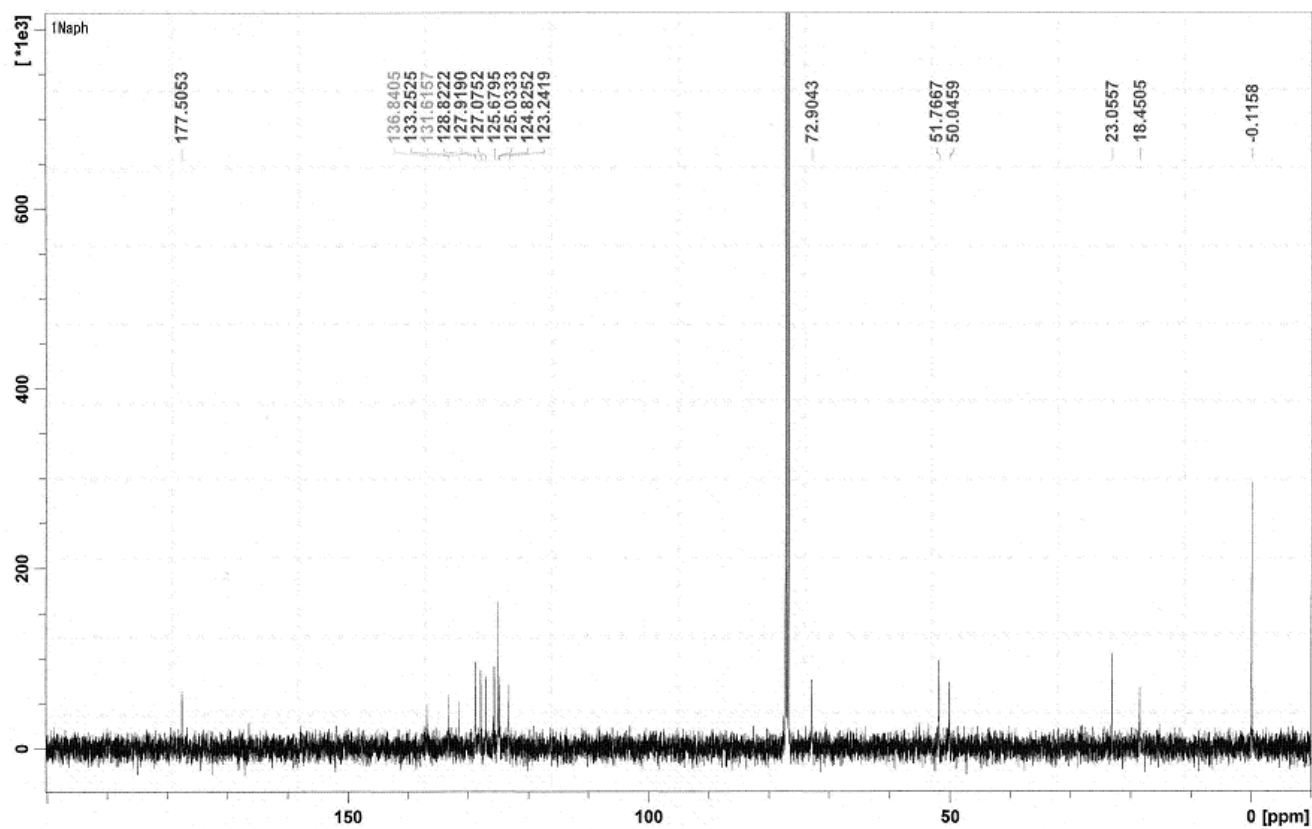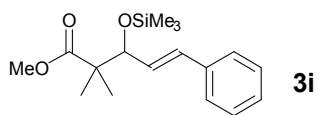

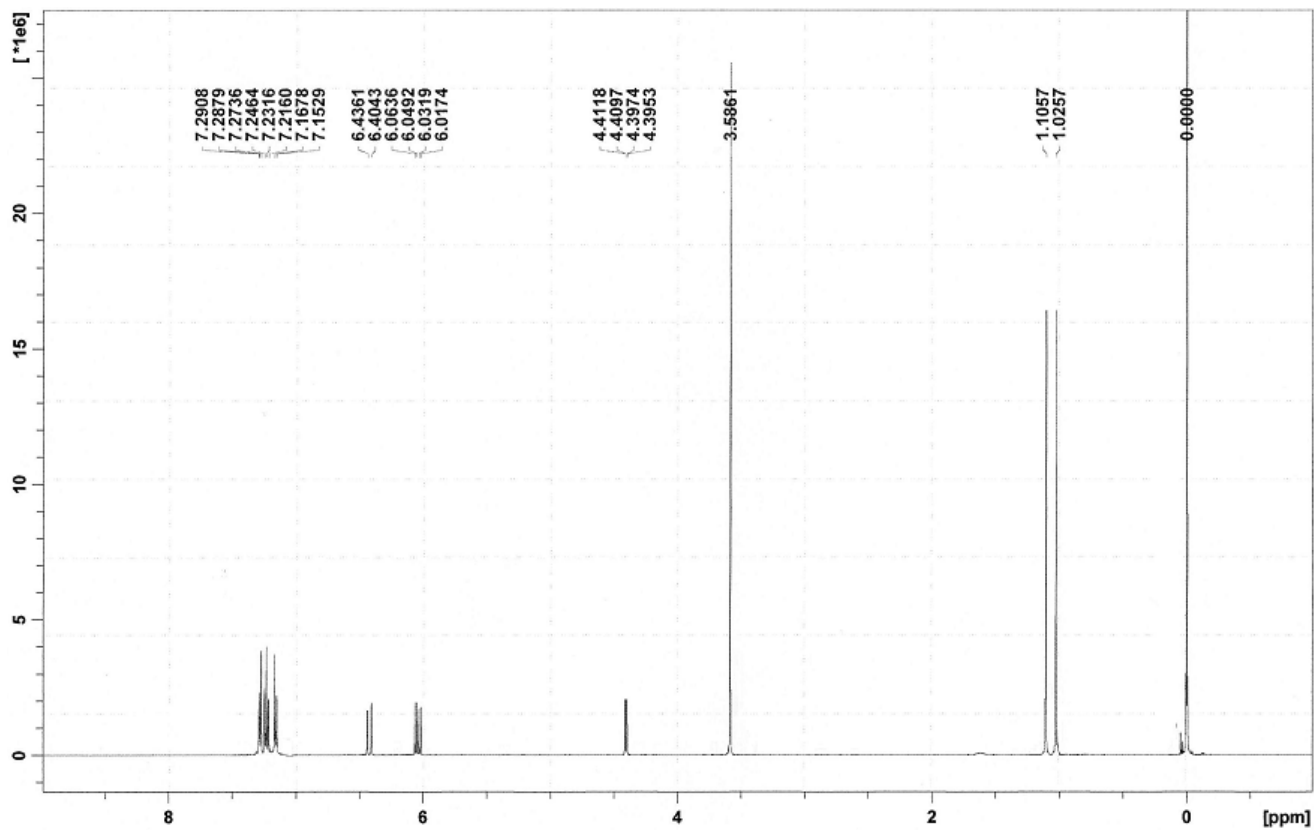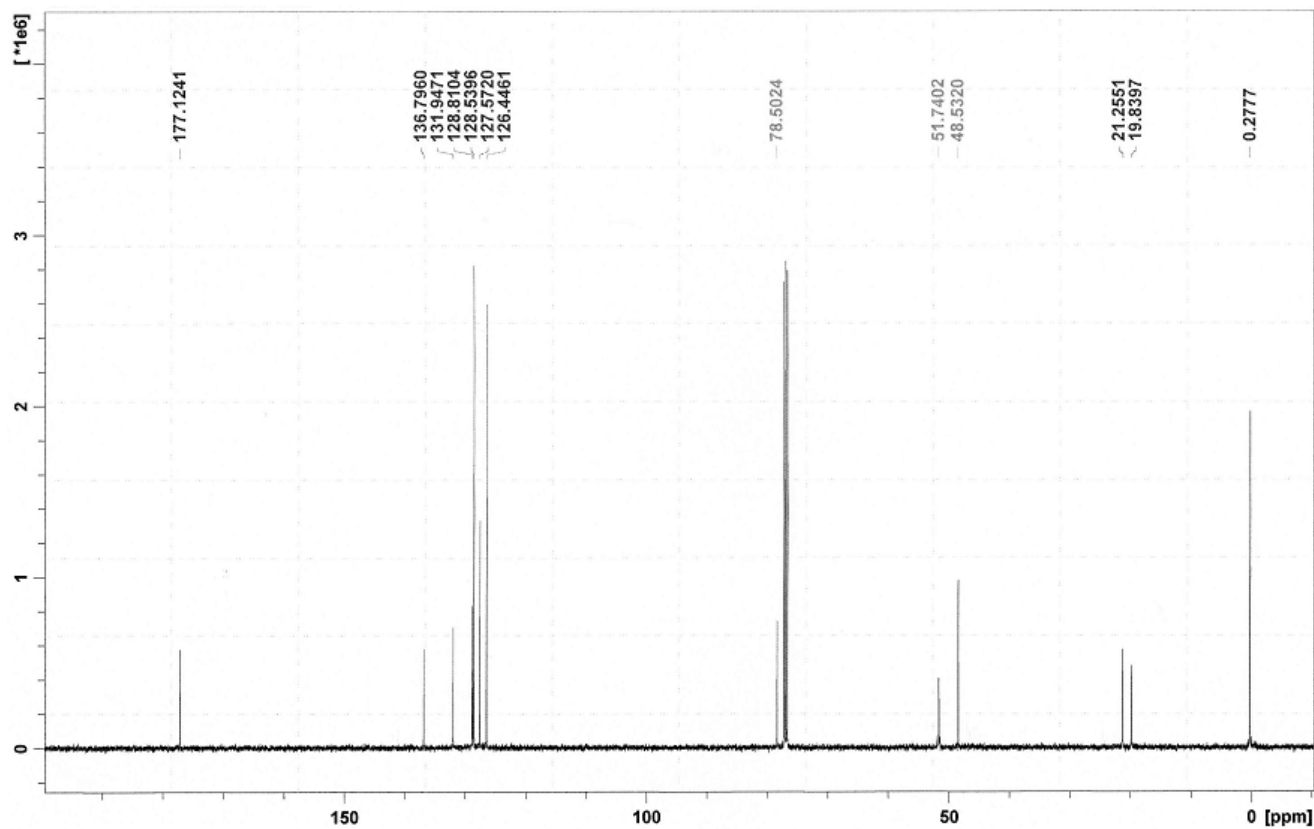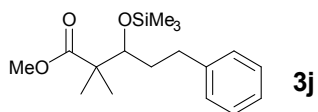

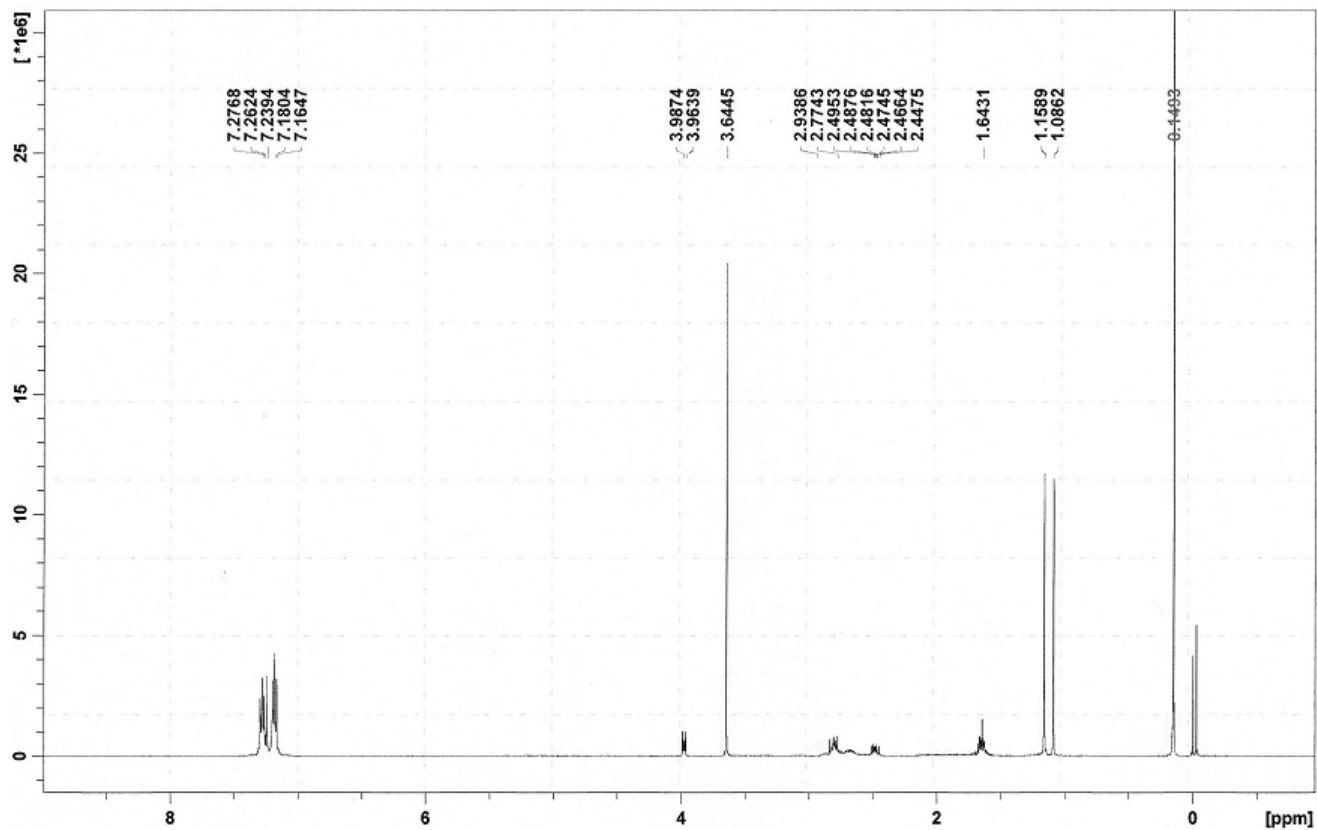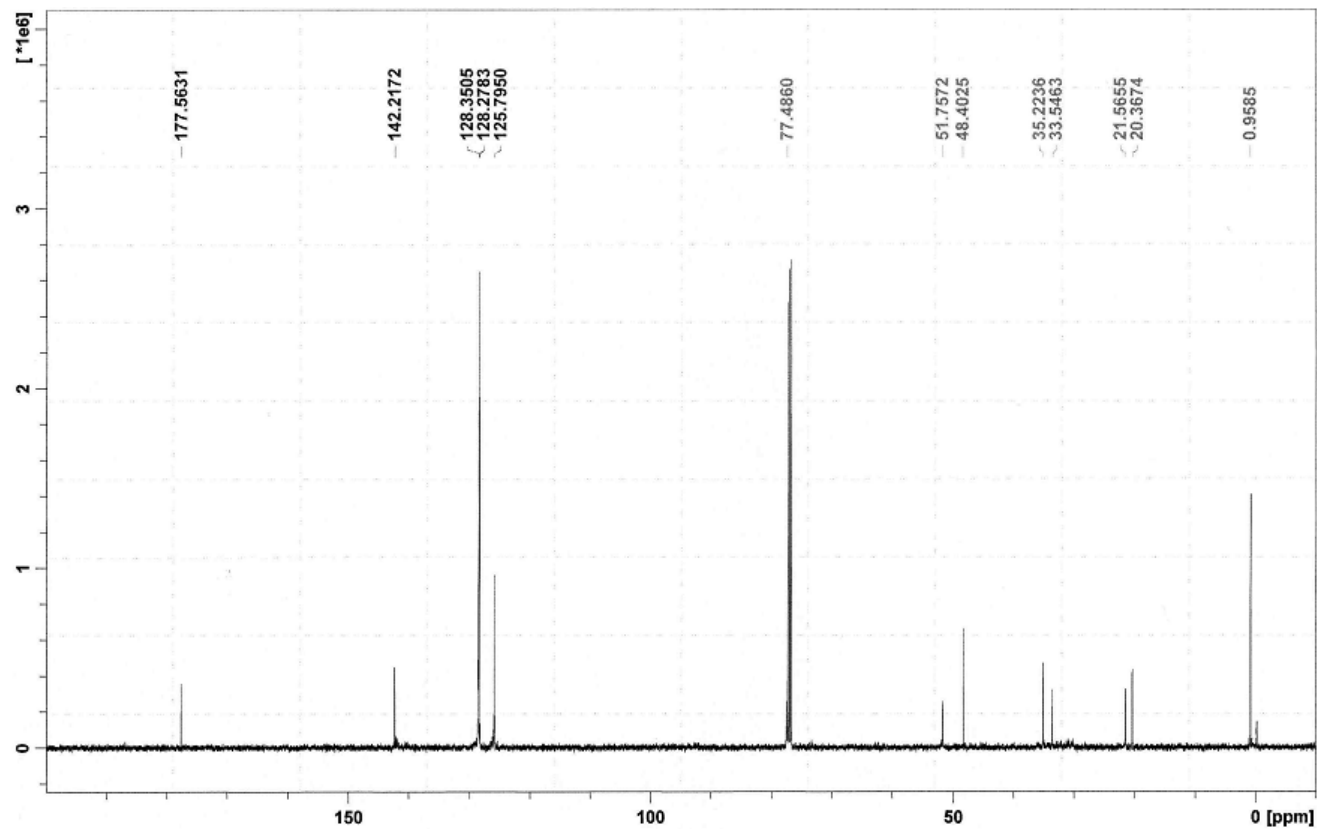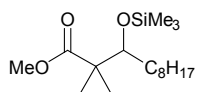

**3k**



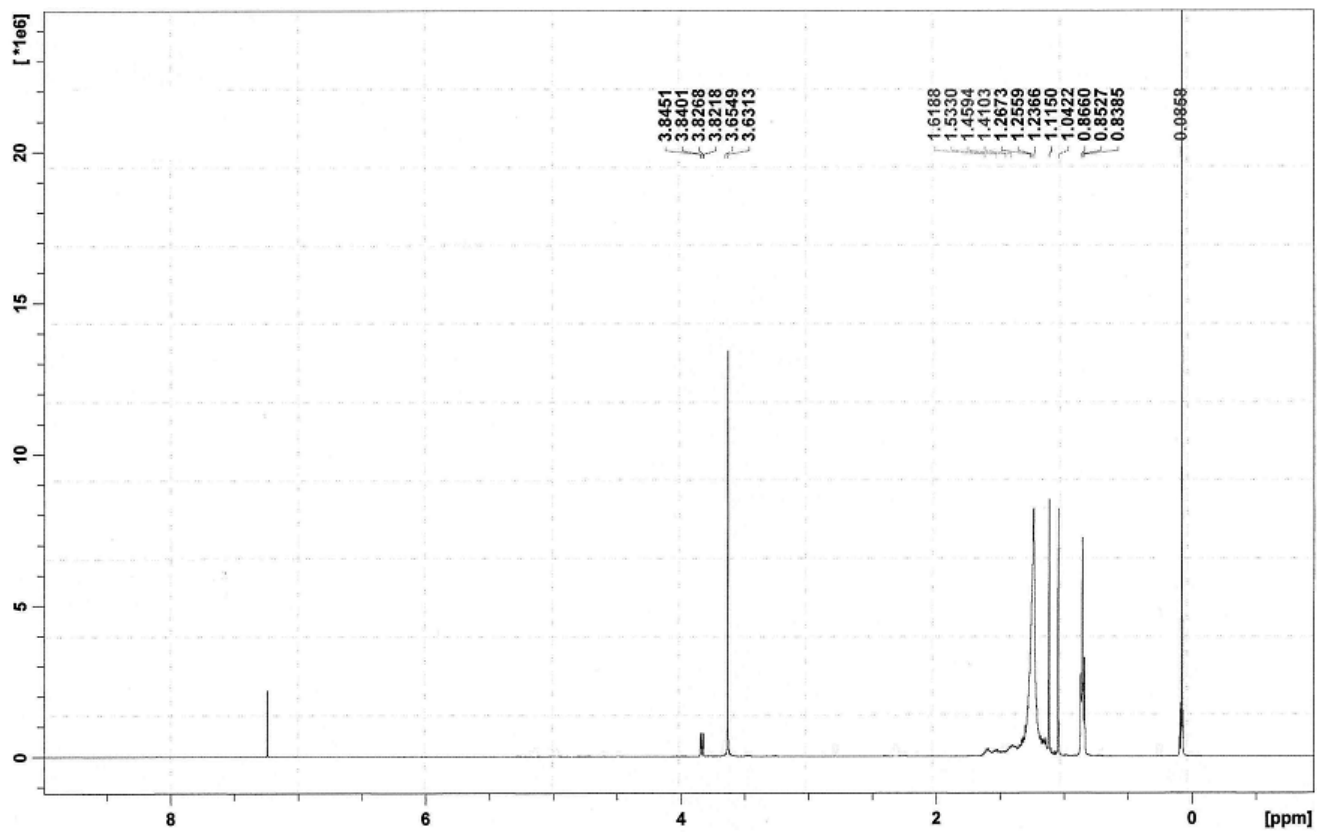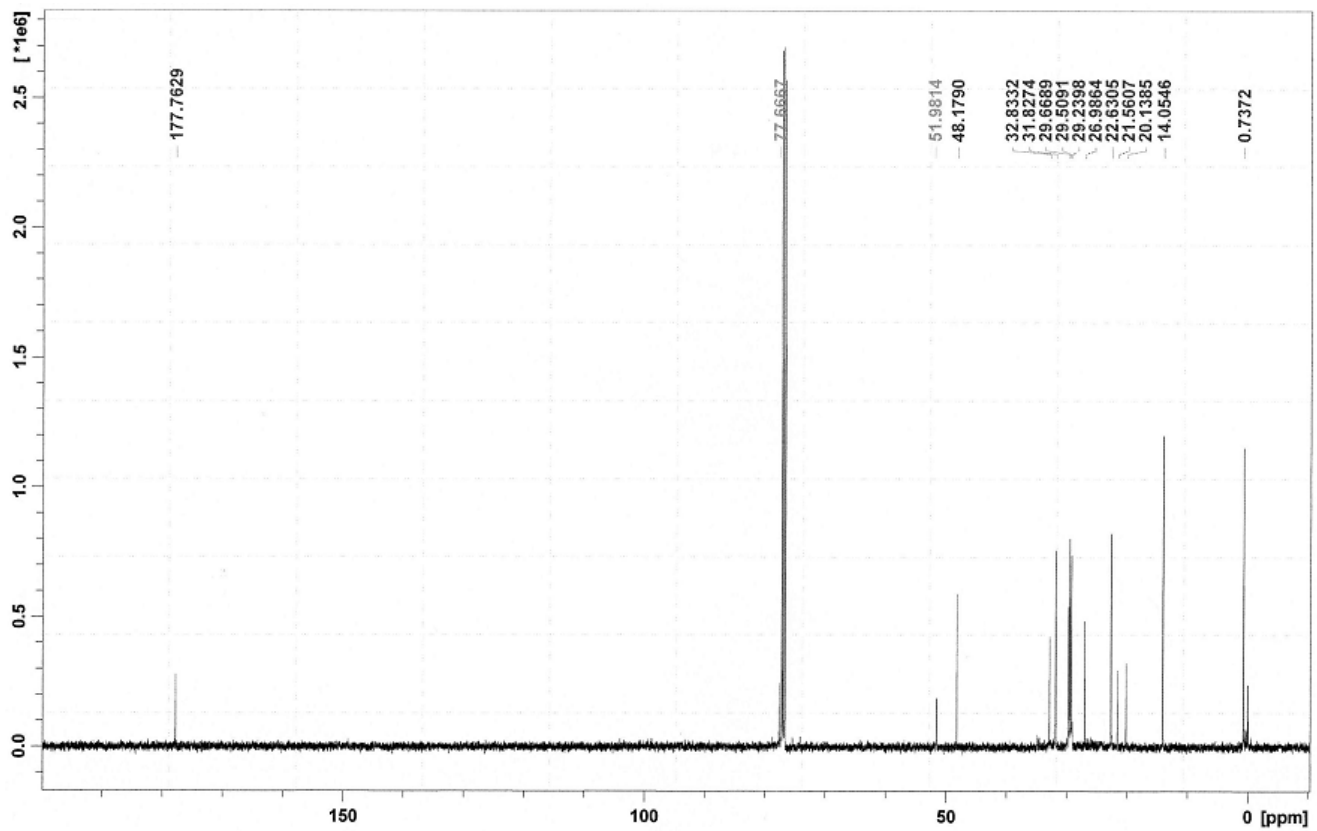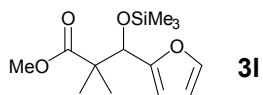

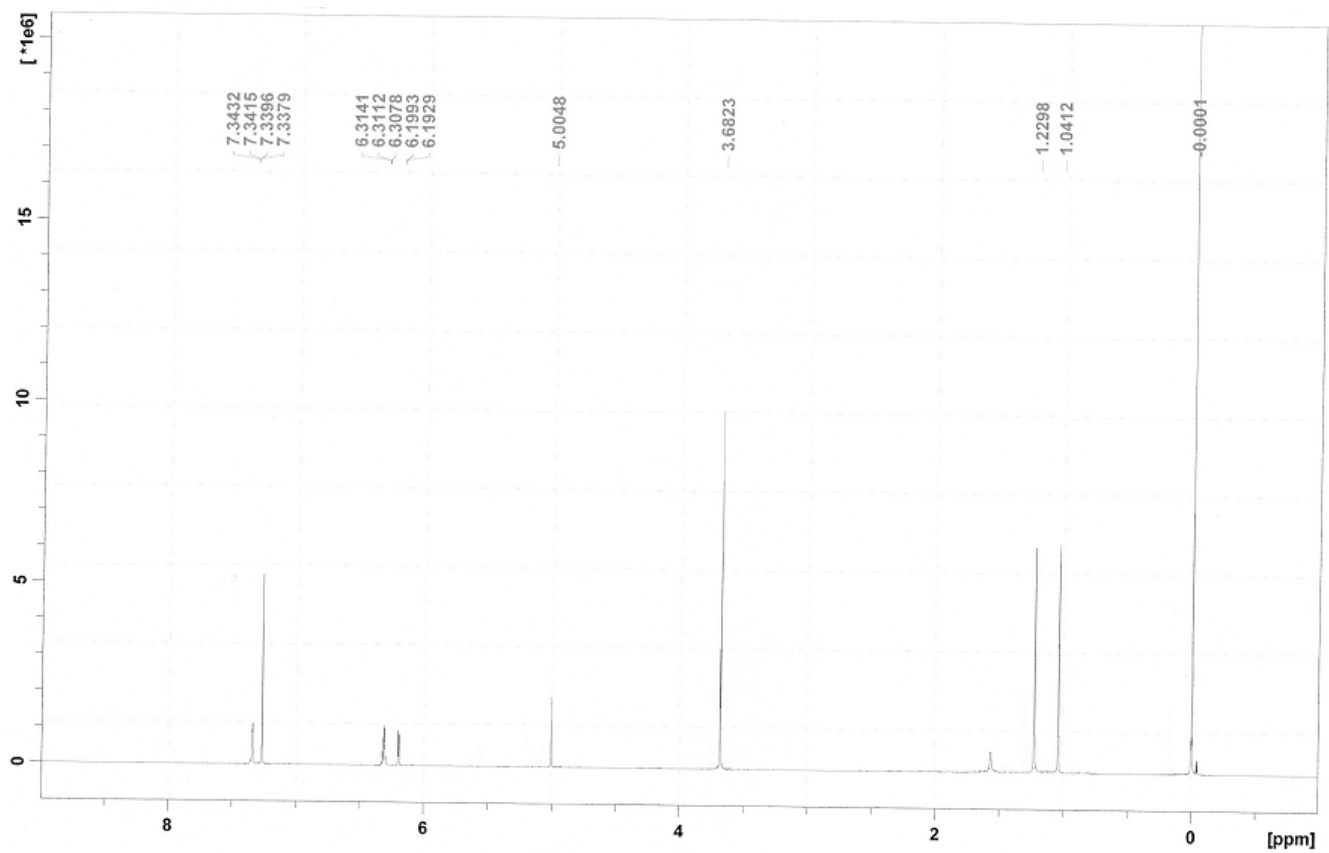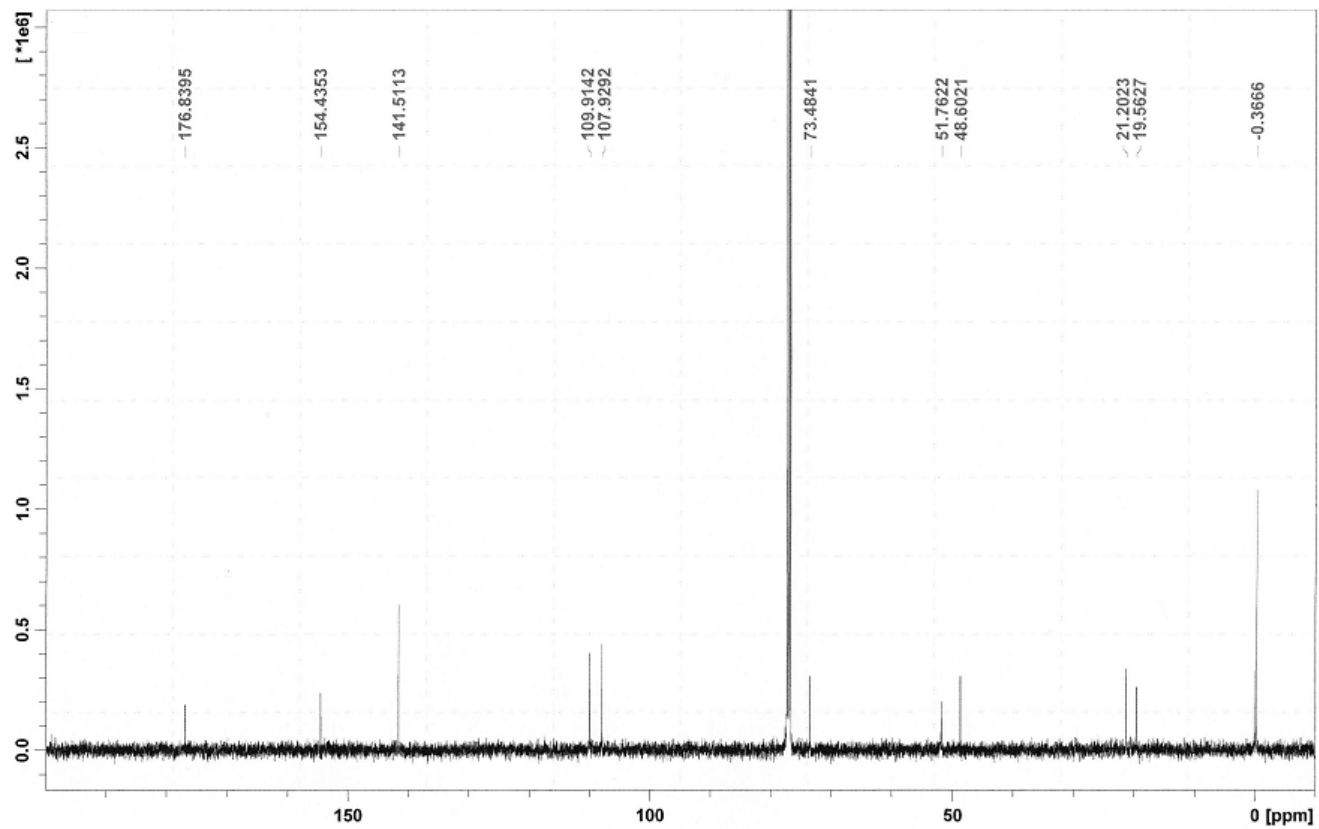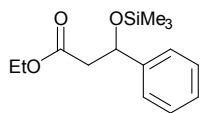

**5a**

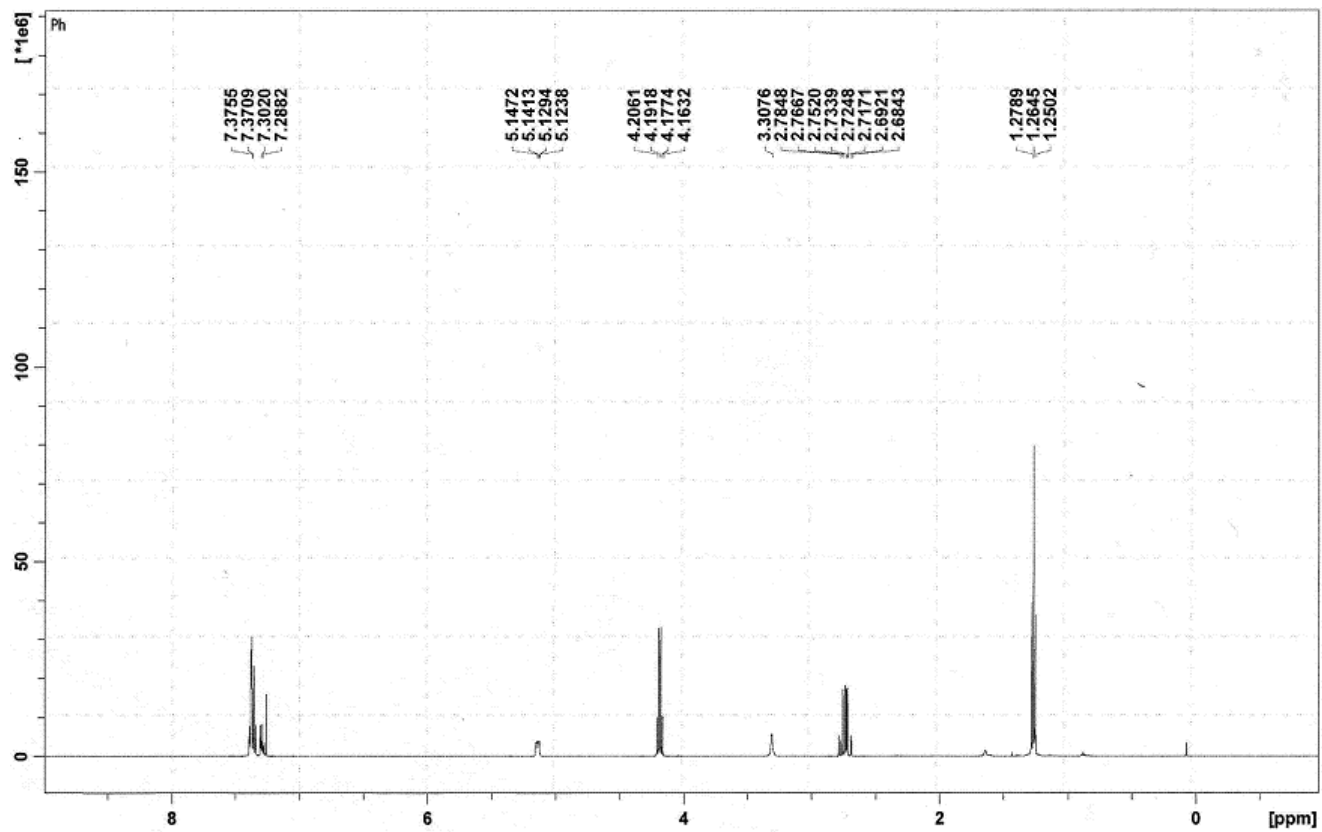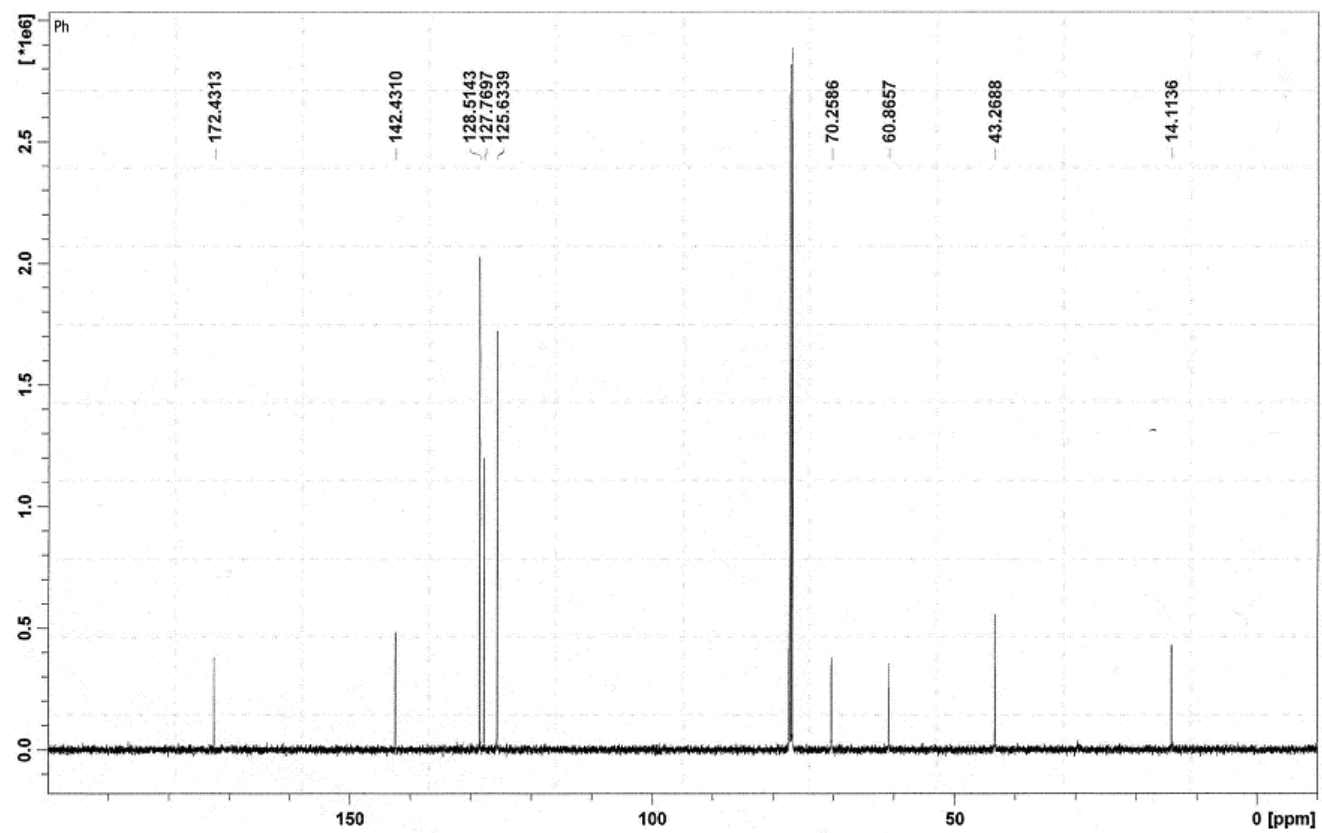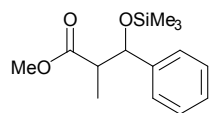

**5b**

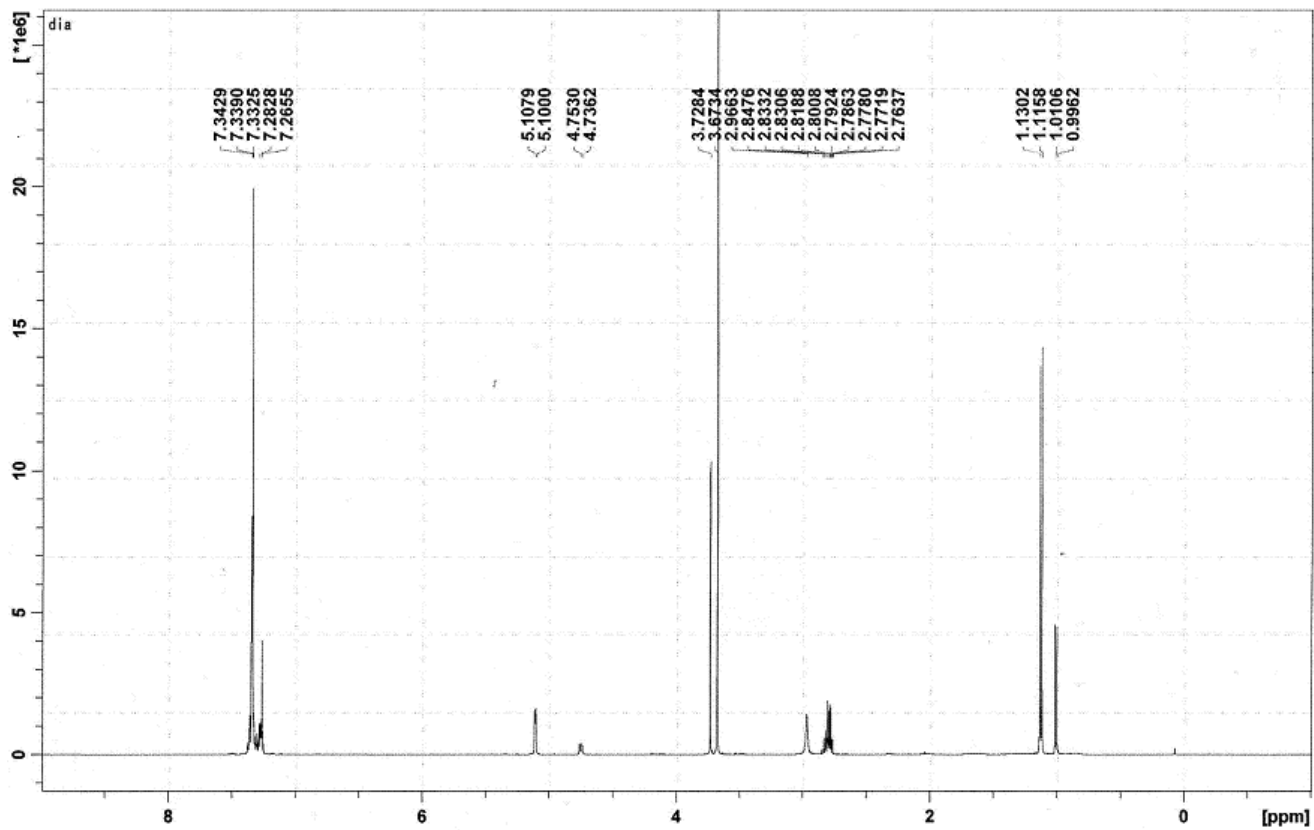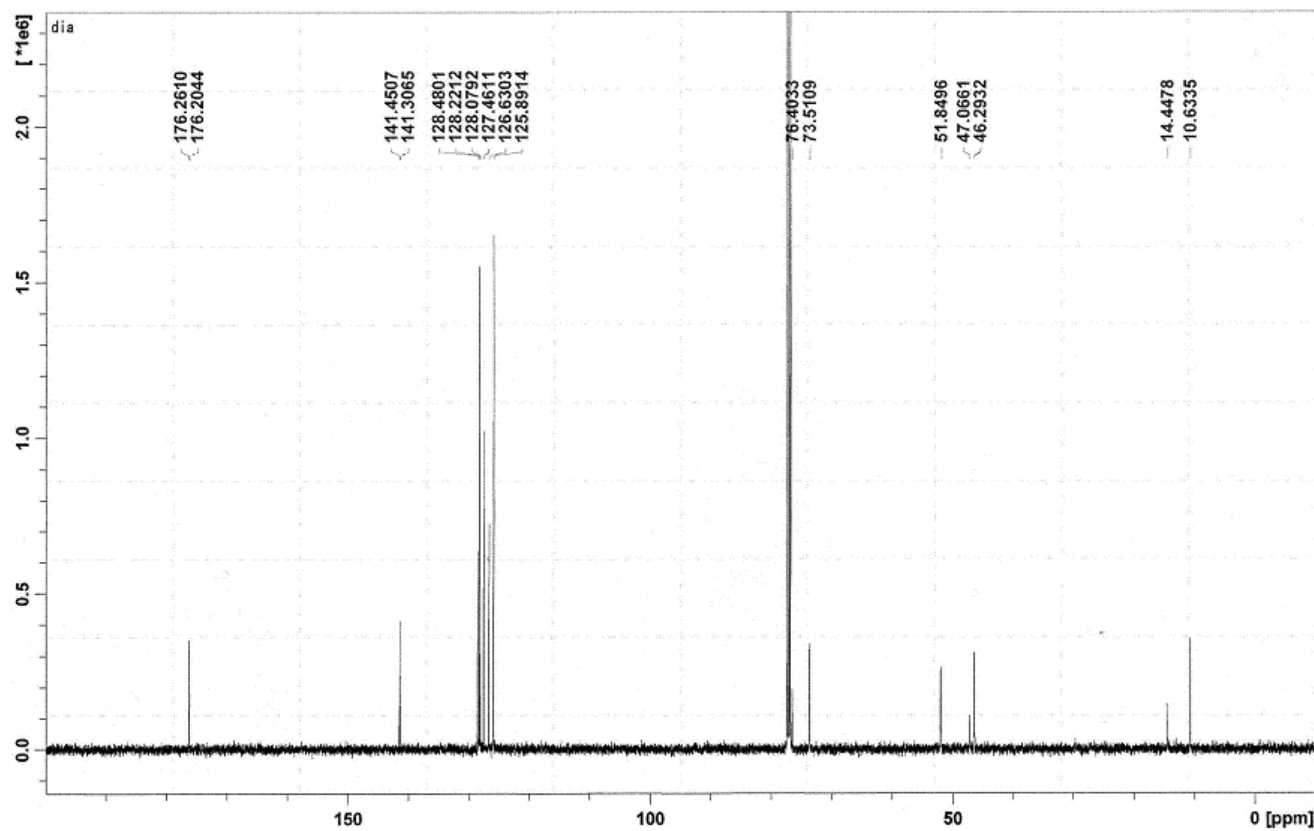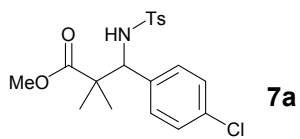

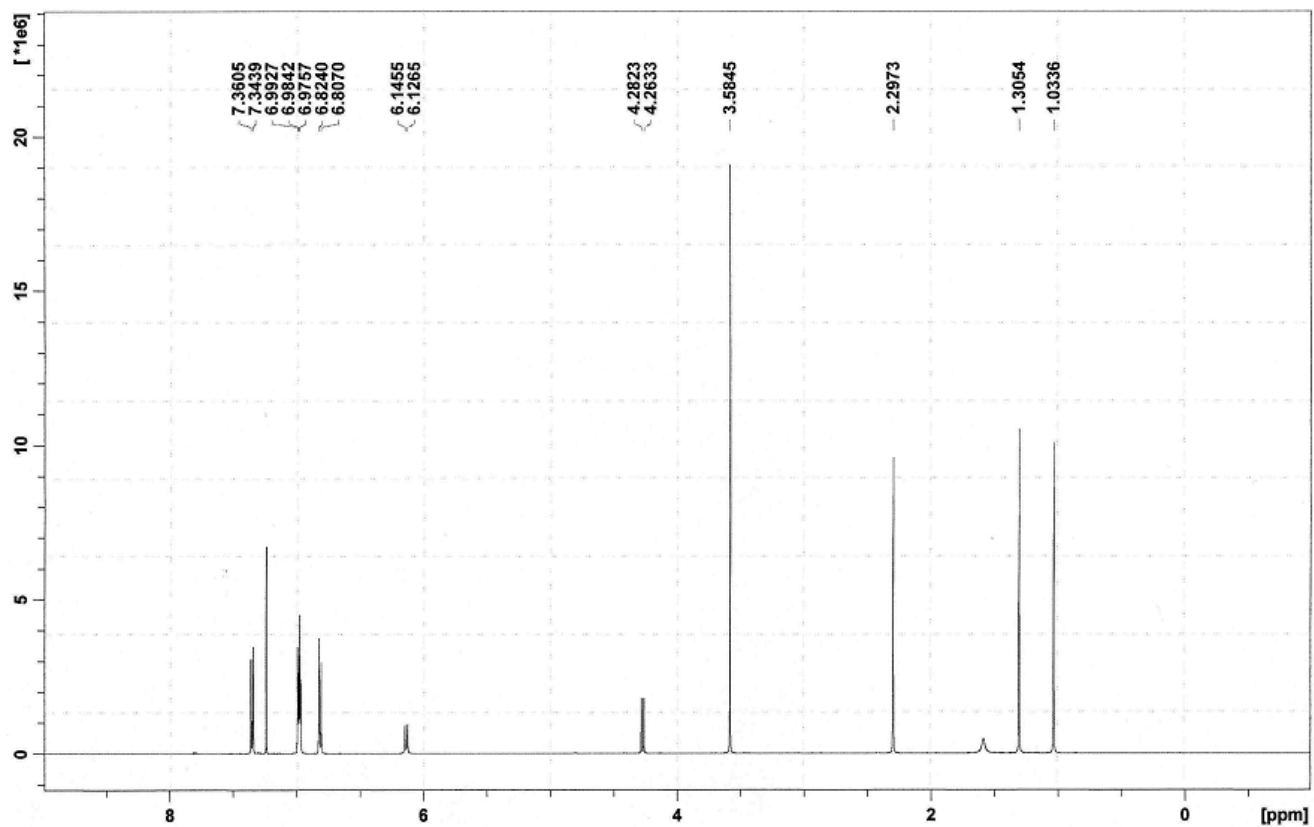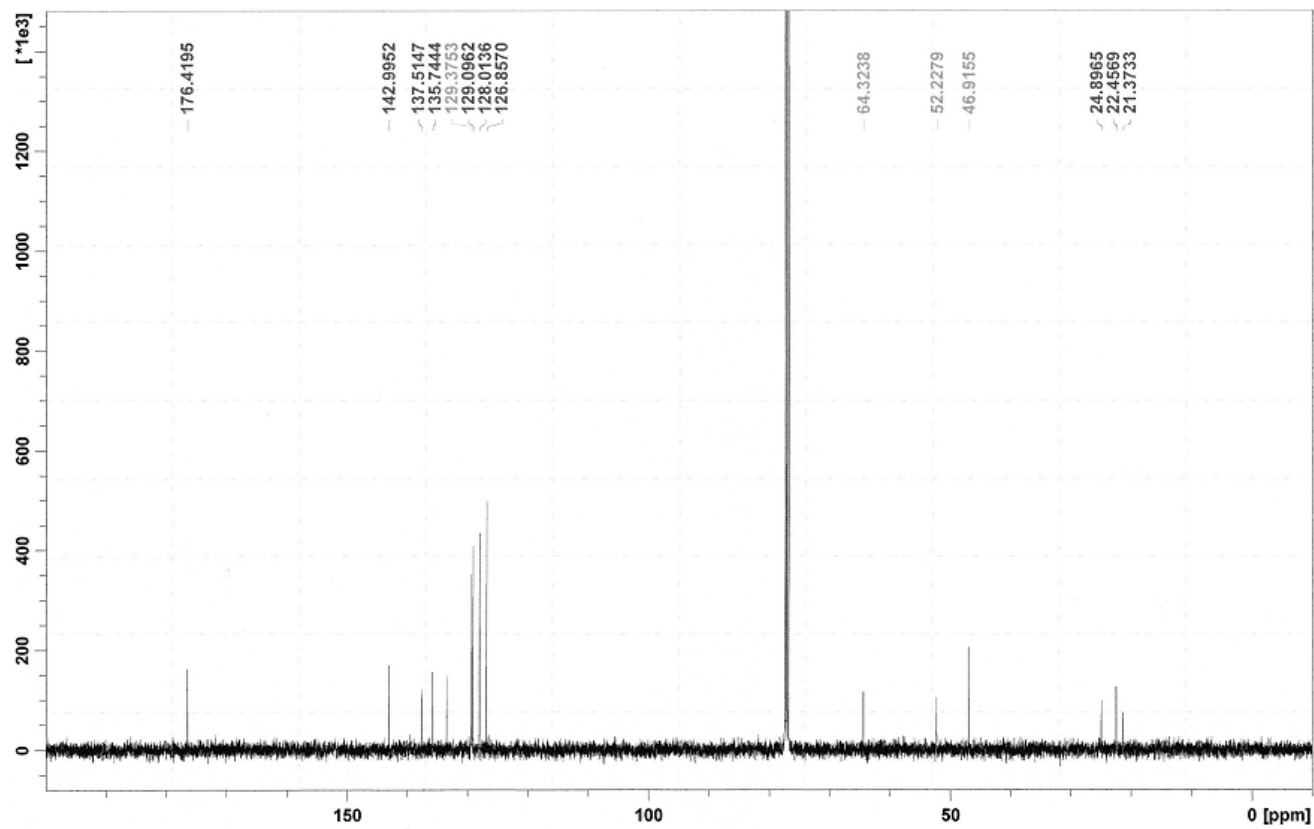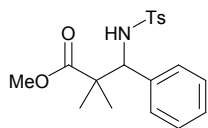

**7b**

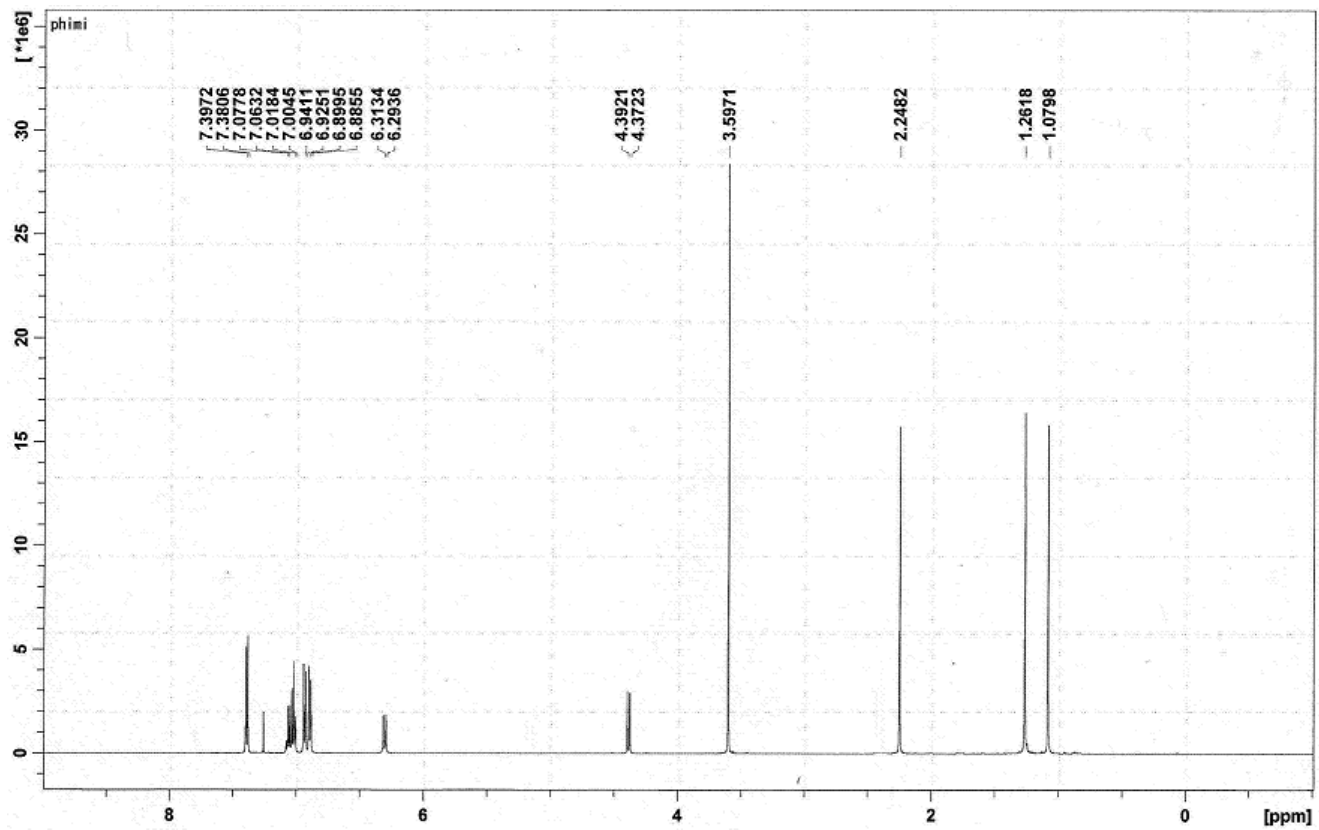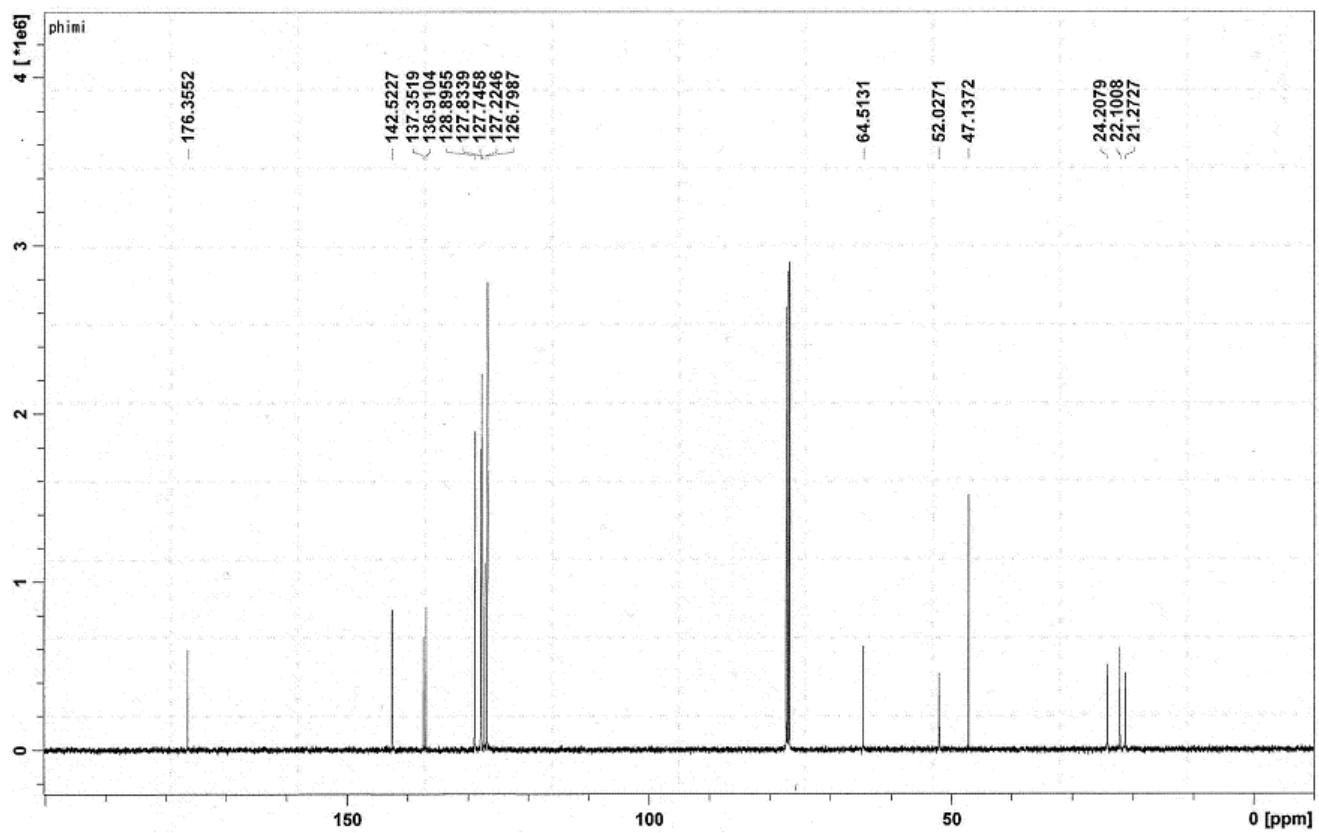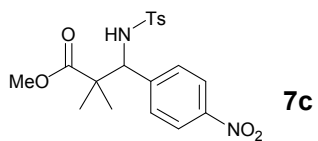

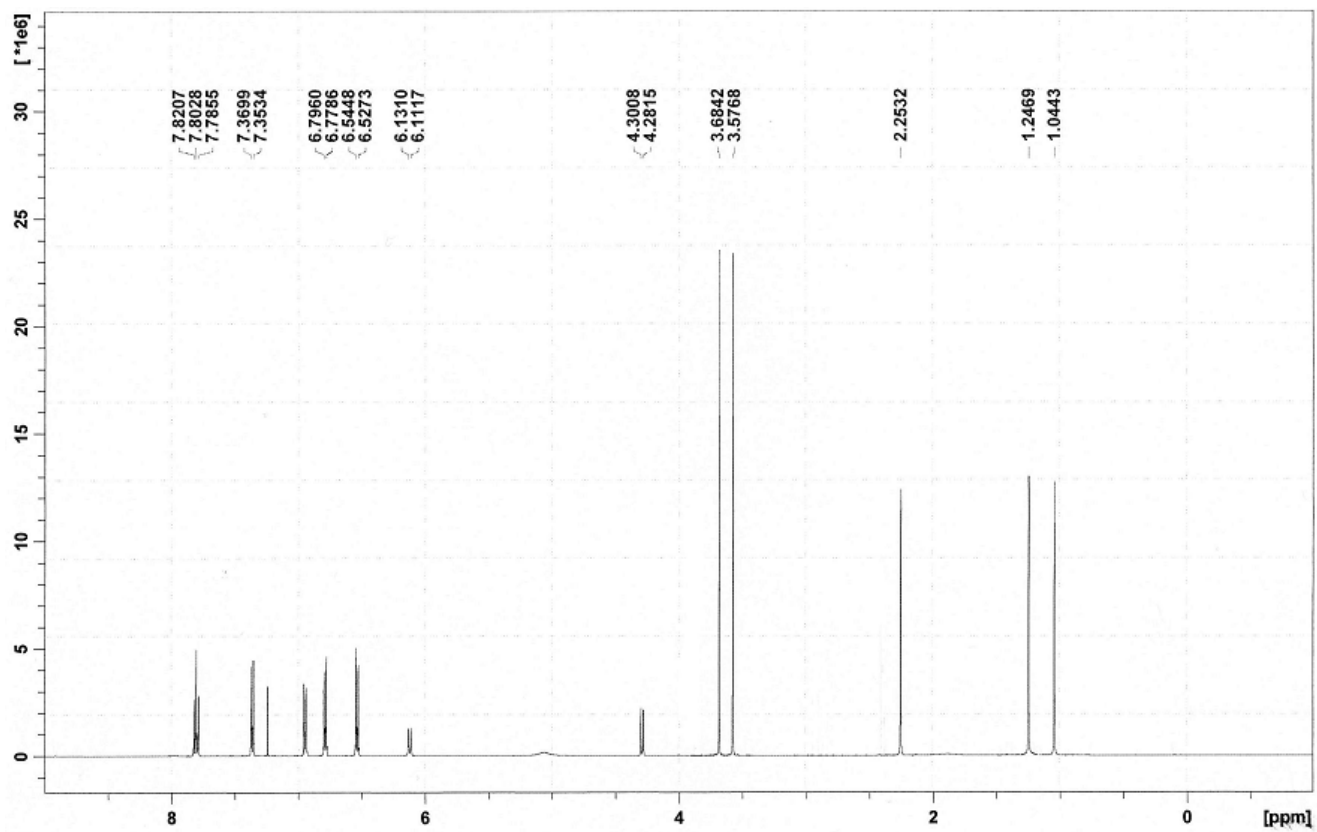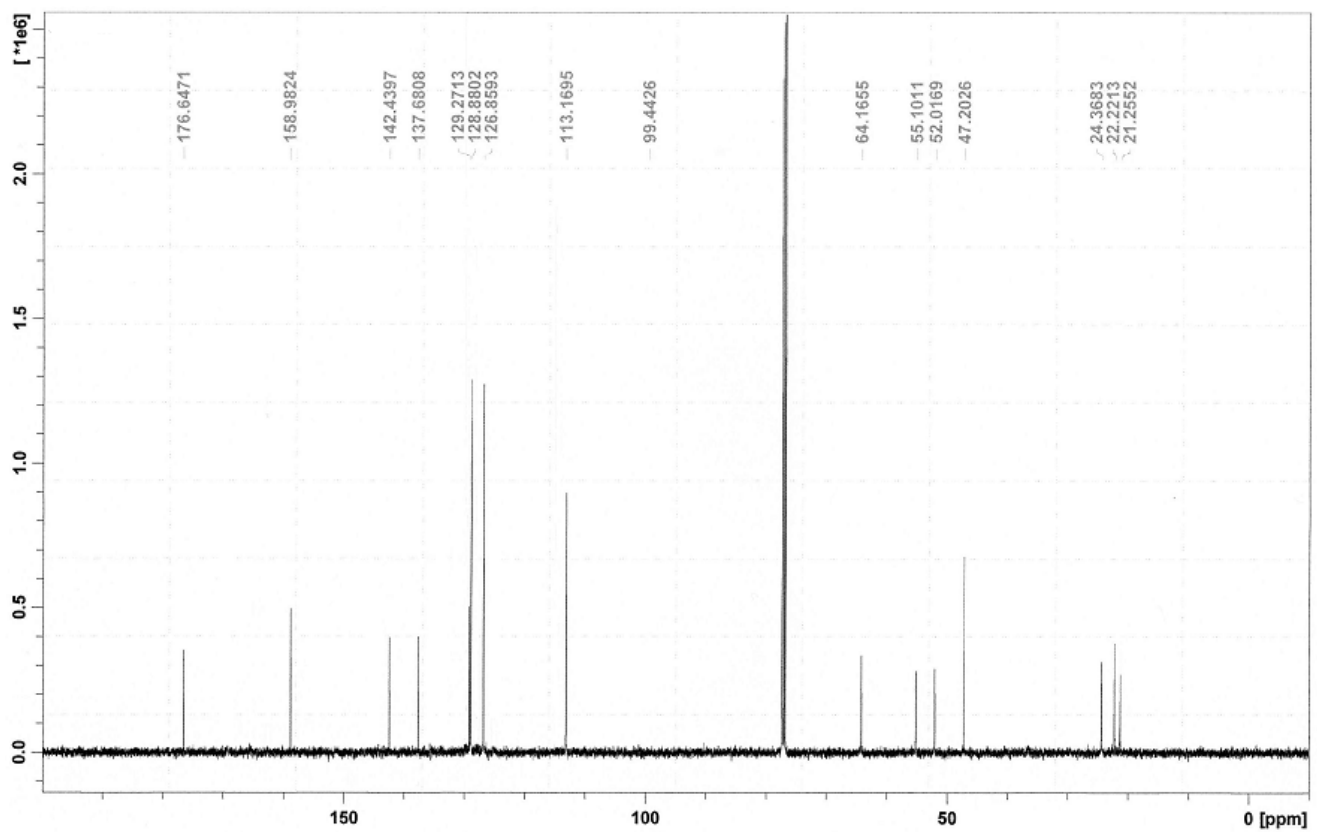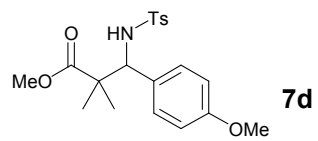

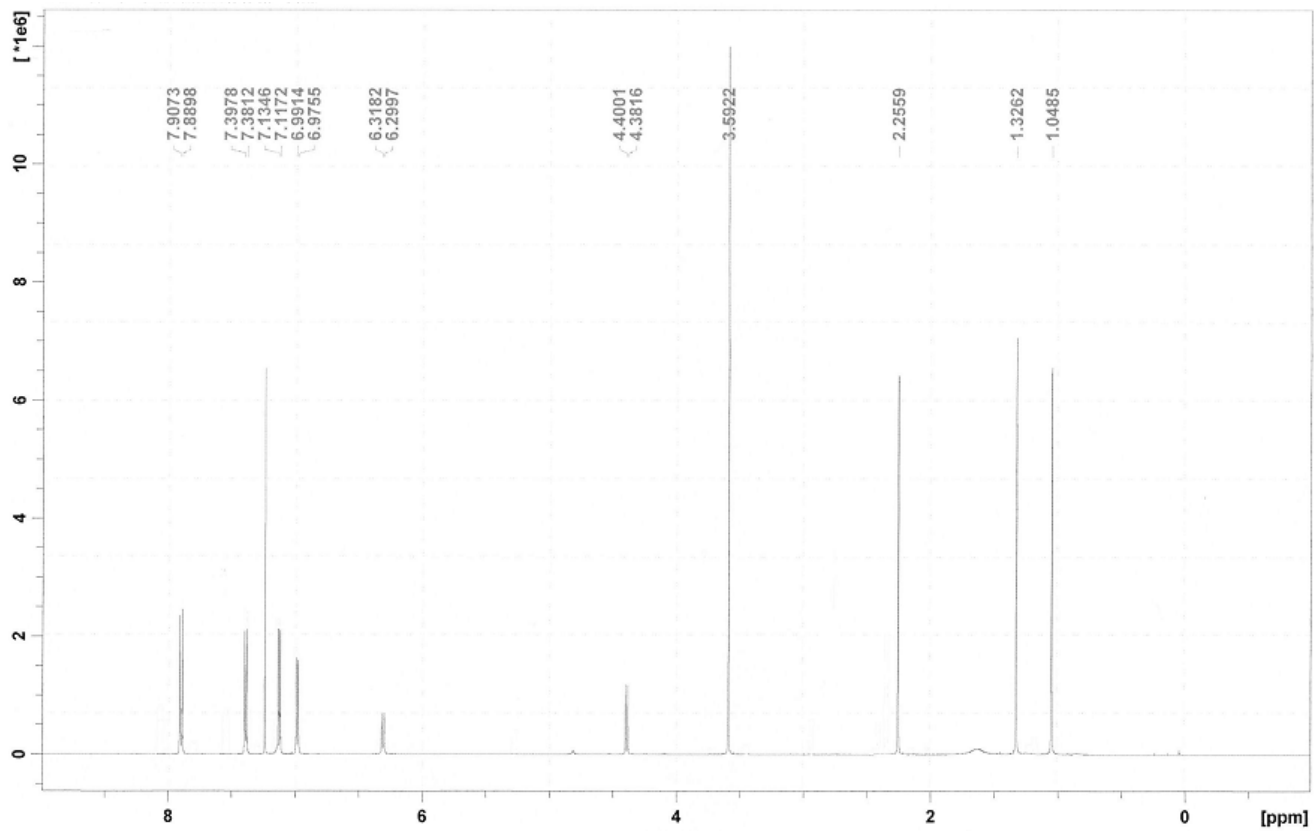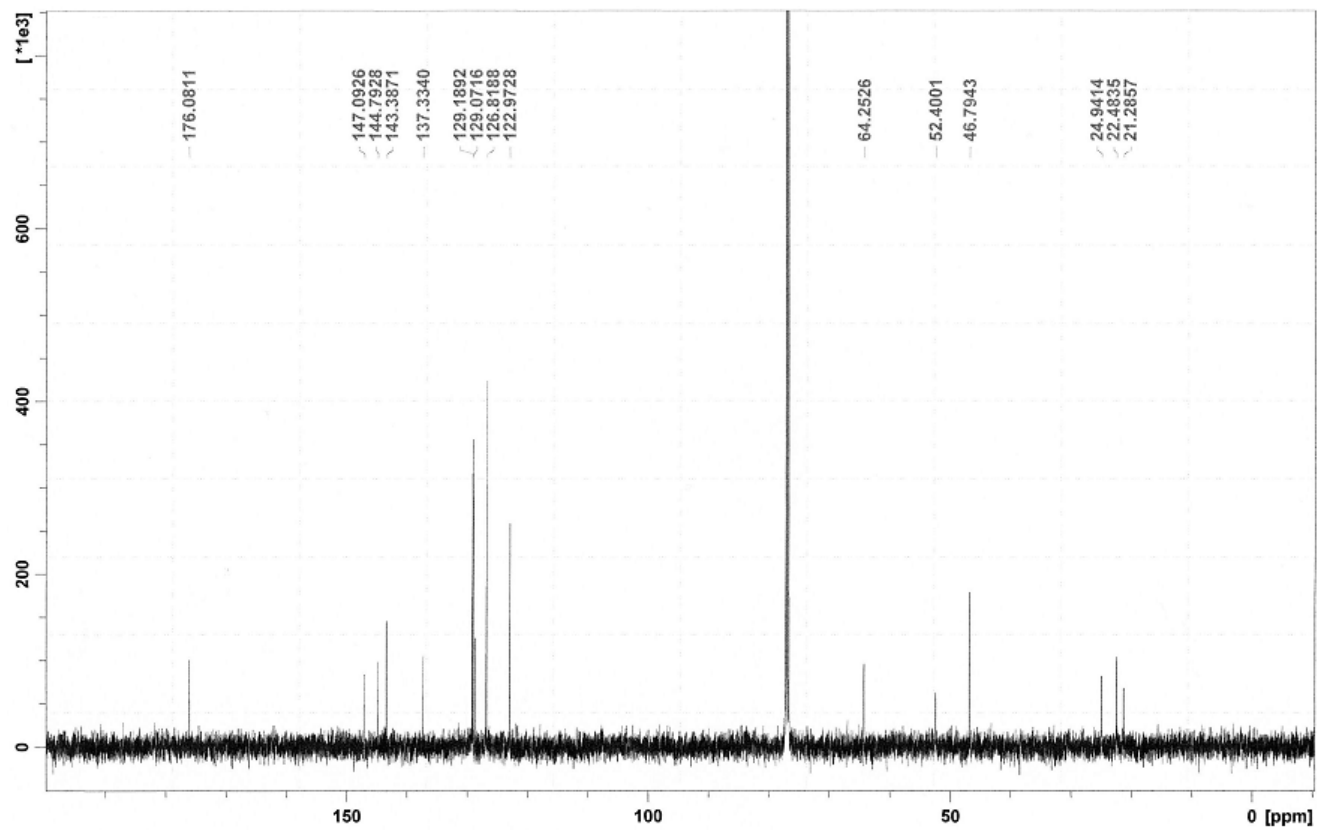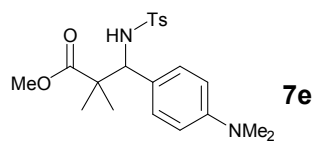



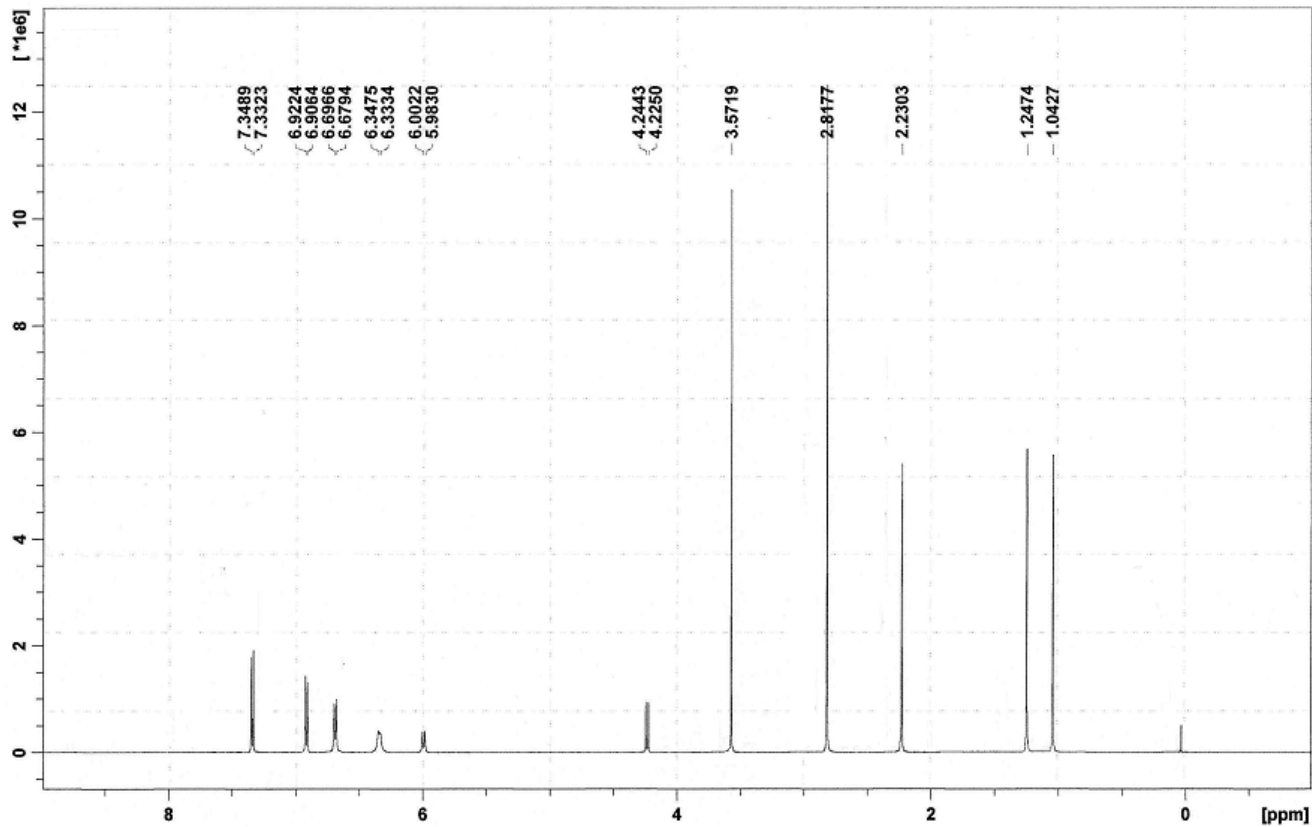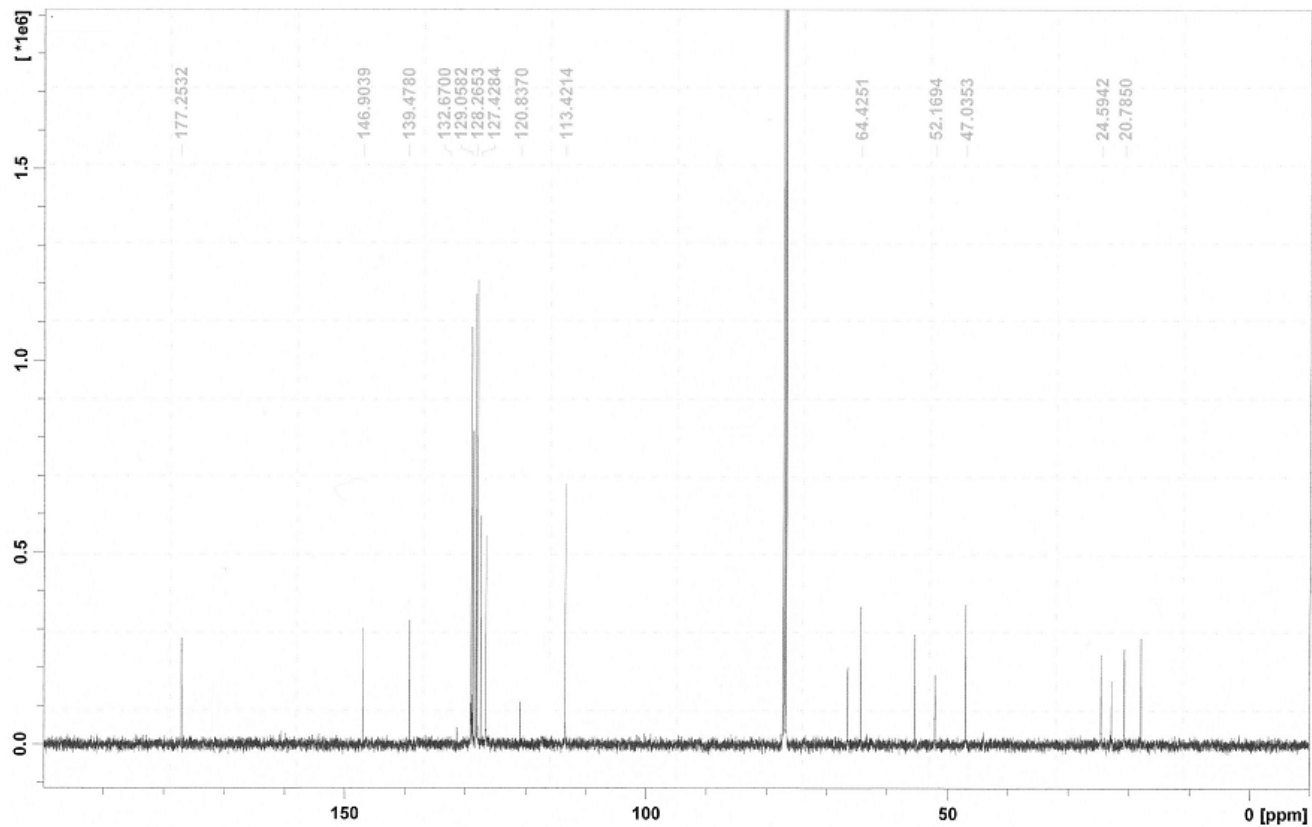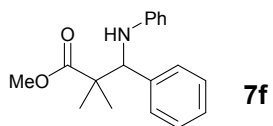

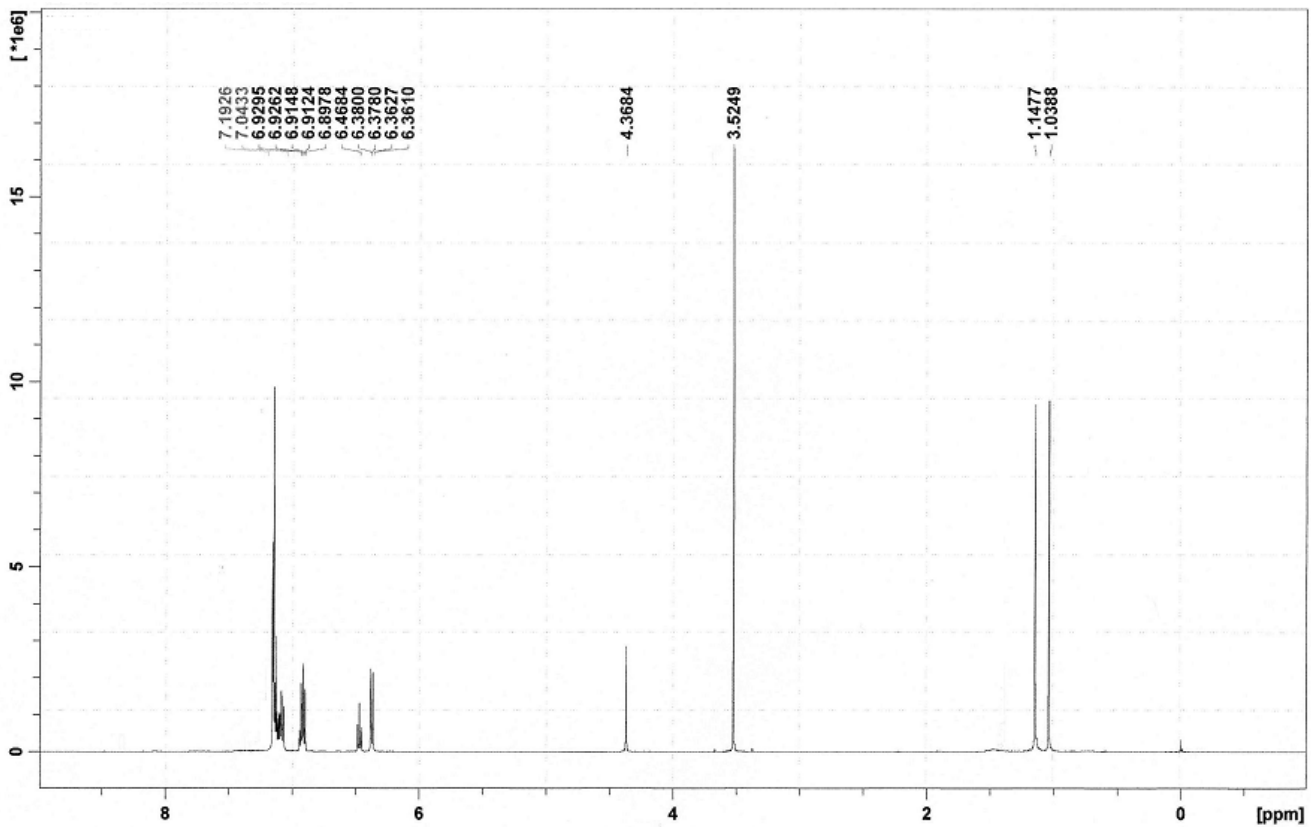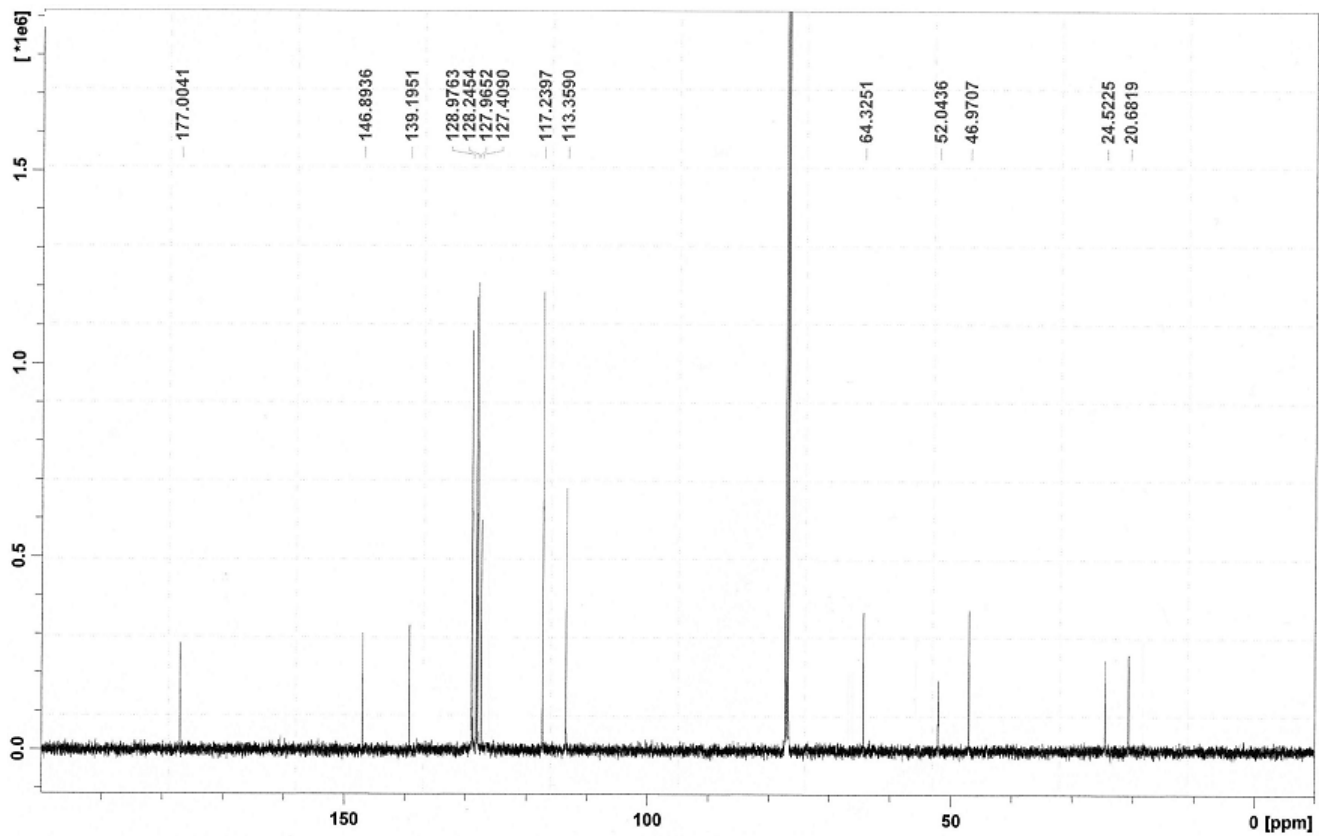

## References

1. N. Giuseppone, P. Van de Weghe, M. Mellah, J. Collin *Tetrahedron*, 1998, **54**, 13129-13148.

2. T. Nakagawa, H. Fujisawa, Y. Nagata, T. Mukaiyama *Bull. Chem. Soc. Jpn*, 2004, **77**, 1555-1567.
3. G. Onodera, T. Oeda, N. Toda, D. Shibagishi, R. Takeuchi *Tetrahedron*, 2010, **66**, 9021-9031.
4. K. Gedrich, M. Heitbaum, A. Notzon, I. Senkowska, R. Fröhlich, J. Getzschmann, U. Mueller, F. Glorius, S. Kaskel *Chem. Euro. J.*, 2011, **17**, 2099-2106.
5. M. Abe, M. Ikeda, Y. Shirodai, M. Nojima *Tetrahedron Lett.* 1996, **37**, 5901-5904.
6. H. Fujisawa, E. Takahashi, T. Mukaiyama *Chem. Eur. J.* 2006, **12**, 5082-5093.
